# Supplementary material for: Nanostructured lipopeptide-based membranomimetics for stabilizing bacteriorhodopsin
Source: Royal Society of Chemistry journal article supplement (doi:10.1039/d4bm00250d), 2024-01-01
Supplement: d4bm00250d1.pdf [file d4bm00250d1.pdf]

Supporting information

Nanostructured lipopeptide-based membranomimetics for stabilizing bacteriorhodopsin

*Arun Bahadur Gurung,<sup>1</sup> Kasturee Chakraborty,<sup>1‡</sup> Snehasish Ghosh,<sup>2‡</sup> Somnath Jan,<sup>1</sup> Paramita Gayen,<sup>1</sup> Abhijit Biswas,<sup>2</sup> Argha Mario Mallick,<sup>1</sup> Monjuri Hembram,<sup>1</sup> Archana Tripathi,<sup>1</sup> Asmita Mukherjee,<sup>1</sup> Sanchita Mukherjee,<sup>1</sup> Arnab Mukherjee,<sup>3\*</sup> Dhananjay Bhattacharyya<sup>4\*</sup> and Rituparna Sinha Roy<sup>1,5,6\*</sup>*

<sup>1</sup>Department of Biological Sciences, Indian Institute of Science Education and Research Kolkata, Mohanpur- 741246, West Bengal, India

<sup>2</sup>Department of Chemical Sciences, Indian Institute of Science Education and Research Kolkata, Mohanpur- 741246, West Bengal, India

<sup>3</sup>Department of Chemistry, Indian Institute of Science Education and Research Pune, Pune, India

<sup>4</sup>Computational Science Division, Saha Institute of Nuclear Physics, Kolkata, 1/AF Bidhannagar, Kolkata- 700064, India

<sup>5</sup>Centre for Advanced Functional Materials, Indian Institute of Science Education and Research Kolkata, Mohanpur- 741246, West Bengal, India

<sup>6</sup>Centre for Climate and Environmental Studies, Indian Institute of Science Education and Research Kolkata, Mohanpur- 741246, West Bengal, India

† Equal contribution

\*Corresponding authors:

E-mail: rituparna@iiserkol.ac.in (R.S.R)

E-mail: dhananjay.bhattacharyya@saha.ac.in (D.B.)

E-mail: arnab.mukherjee@iiserpune.ac.in (A.M.)

## **Table of Contents**

Figure S1. Synthesis of linear detergent peptides (by solid phase peptide synthesis protocol – general scheme).

Figure S2. Synthesis of cyclic detergent peptides (by solid phase peptide synthesis protocol – general scheme).

Figure S3. Different lipidic chains and unnatural amino acids used in our engineered facial peptide-detergents.

Figure S4. MALDI-TOF mass spectrum of peptide 1.

Figure S5. MALDI-TOF mass spectrum of peptide 2.

Figure S6. MALDI-TOF mass spectrum of peptide 3.

Figure S7. MALDI-TOF mass spectrum of peptide 4.

Figure S8. MALDI-TOF mass spectrum of peptide 5.

Figure S9. MALDI-TOF mass spectrum of peptide 6.

Figure S10. Histogram of particle size distributions of self-assembled detergent peptides 1 - 6 and OG (Octyl- $\beta$ -D-Glucopyranoside, commercial detergent) obtained from DLS studies.

Figure S11. FE-SEM images of self-assembled detergent peptides.

Figure S12. HR-TEM images of self-assembled detergent peptides.

Figure S13. Flowchart depicting the strategies involved in the development of CHARMM36 force field parameters for unnatural amino acid residues.

Figure S14. Flowchart showing the step-wise protocol for MD simulation of detergent peptides.

Figure S15. Flowchart showing the step-wise protocol for MD simulation of detergent encased BR systems.

Figure S16. Plot of half-life determination of BR in presence of peptide detergents 1-6 and commercial detergent (OG).

Figure S17. RMSD Plot of C $\alpha$  atoms of Peptide Detergents.

Figure S18. Initial models of detergent-encased BR systems at time  $t=0$  ns of MD simulations.

Figure S19. Analyses of secondary structure changes in BR by monitoring backbone dihedral angles-phi and psi of our engineered detergent encased BR systems.

Figure S20. Analyses of secondary structure changes in BR by monitoring backbone dihedral angles-phi and psi of reported detergent encased BR systems.

Figure S21. The dihedral angles of BR-Peptide 2 encased system.

Figure S22. The dihedral angles of BR-Peptide 6 encased system.

Figure S23. The dihedral angles of BR-BP-1 encased system.

Figure S24. The dihedral angles of BR-LPD-12 encased system.

Figure S25. The dihedral angles of BR-PD-1 encased system.

Table S1. Dihedral angle values of Peptide 1.

Table S2. Dihedral angle values of Peptide 2.

Table S3. Dihedral angle values of Peptide 3.

Table S4. Dihedral angle values of Peptide 4.

Table S5. Dihedral angle values of Peptide 5.

Table S6. Dihedral angle values of Peptide 6.

Table S7. Dihedral angle values of Peptide BP-1.

Table S8. Dihedral angle values of Peptide LPD-12.

Table S9. Dihedral angle values of Peptide PD-1.

Table S10. Dihedral angle values of detergent-like Peptide A<sub>6</sub>D.

Table S11. Dihedral angle values of detergent-like Peptide A<sub>6</sub>K.

Table S12. The half-life period of BR in the presence of peptides 1-6 and OG.

Table S13. Important parameters of detergent encased BR systems obtained from MD simulations.

Table S14. Molecular interactions in Peptide 1 encased BR system.

Table S15. Molecular interactions in Peptide 2 encased BR system.

Table S16. Molecular interactions in Peptide 3 encased BR system.

Table S17. Molecular interactions in Peptide 4 encased BR system.

Table S18. Molecular interactions in Peptide 5 encased BR system.

Table S19. Molecular interactions in Peptide 6 encased BR system.

Table S20. Molecular interactions in OG encased BR system.

Table S21. Molecular interactions in BP-1 encased BR system.

Table S22. Molecular interactions in LPD-12 encased BR system.

Table S23. Molecular interactions in PD-1 encased BR system.

Table S24. Molecular interactions in A<sub>6</sub>D encased BR system.

Table S25. Molecular interactions in A<sub>6</sub>K encased BR system.

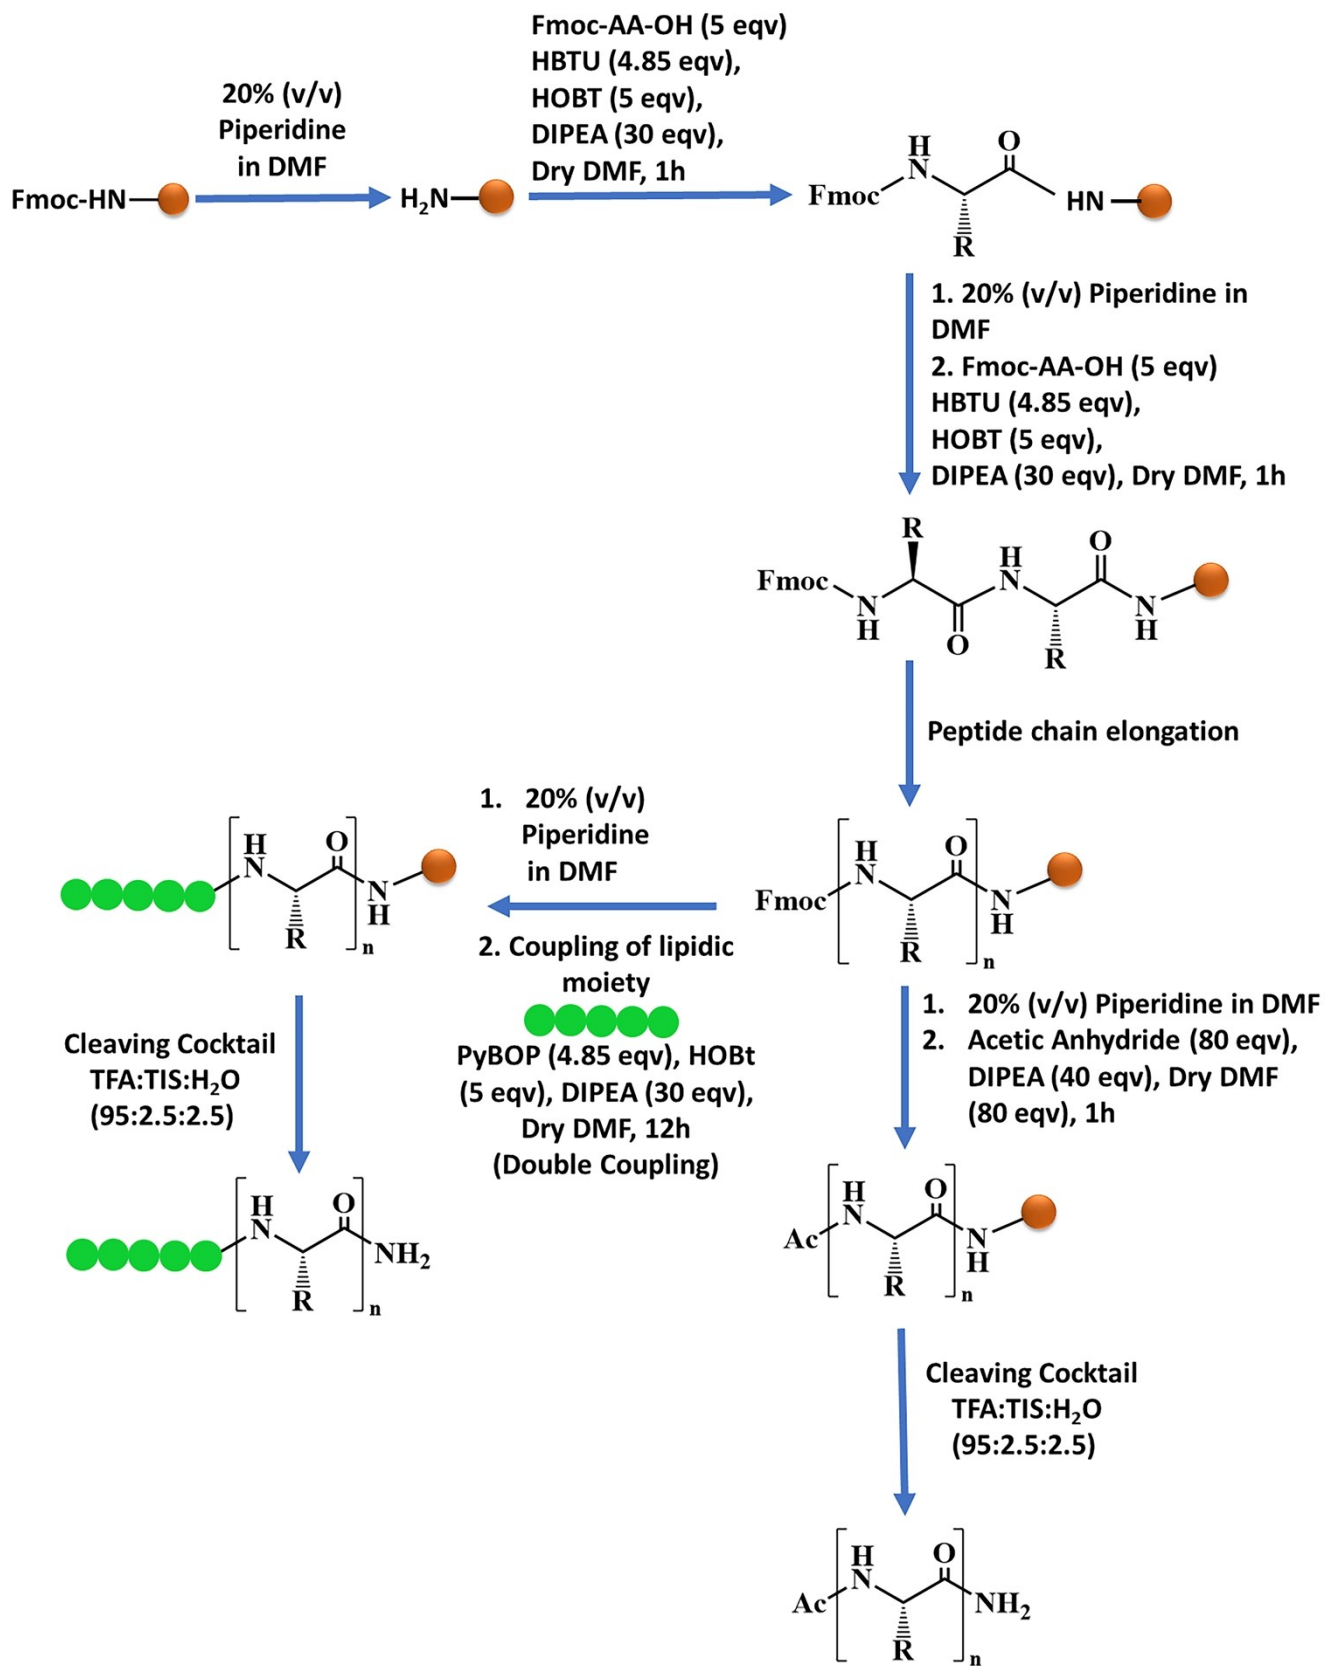

**Figure S1.** Synthesis of linear detergent peptides (by solid phase peptide synthesis protocol – general scheme).



## Lipidic moieties and unnatural amino acids used in engineered facial peptide-detergents

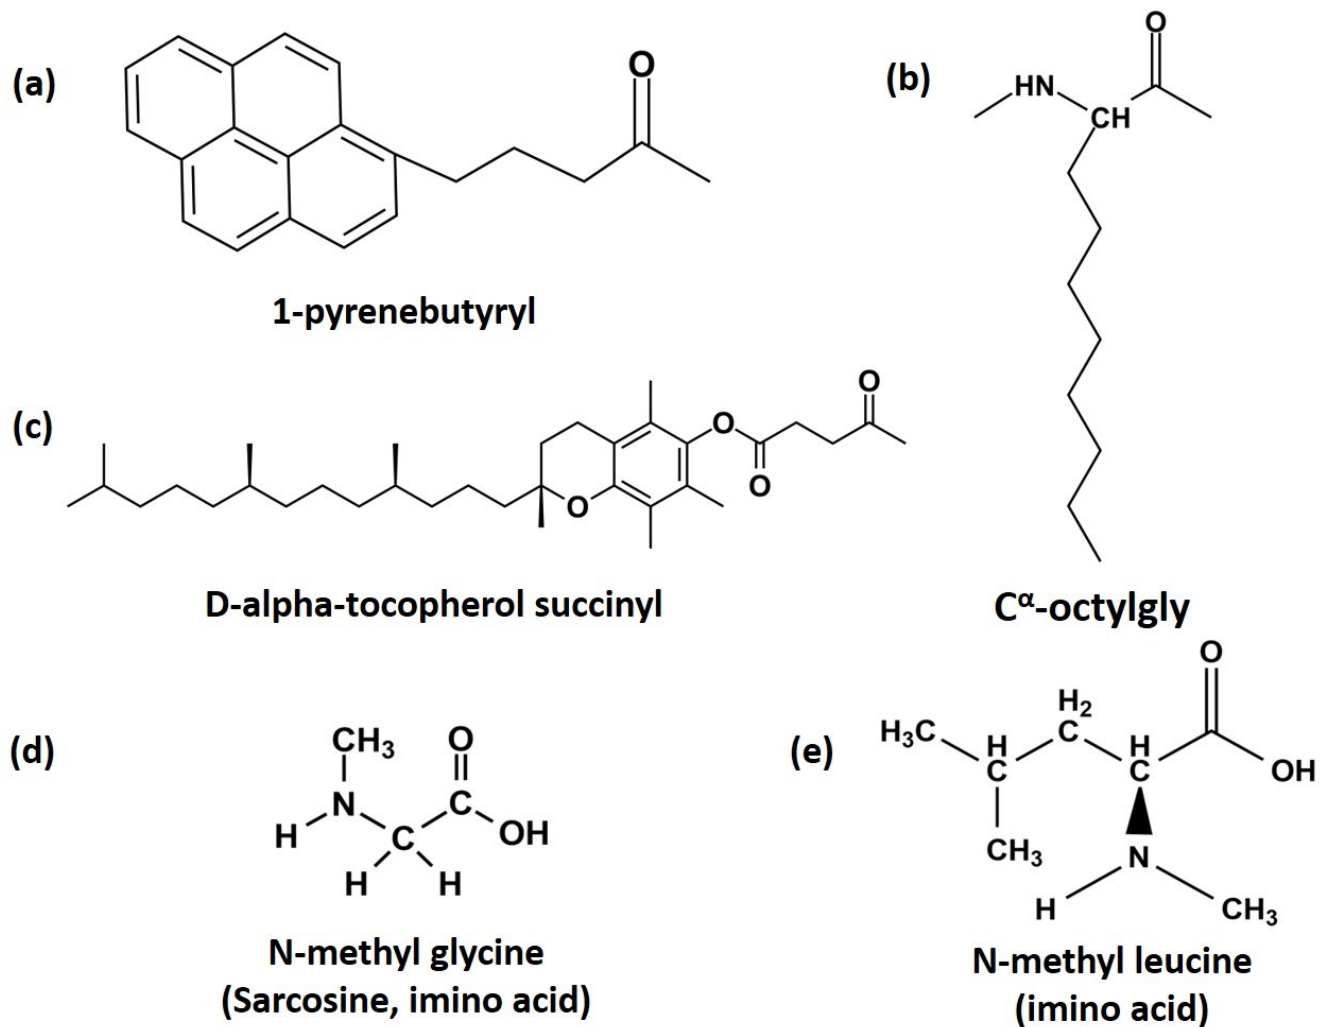

**Figure S3.** Different lipidic chains (a-c) and unnatural amino acids (d-e) used in our engineered facial peptide-detergents.

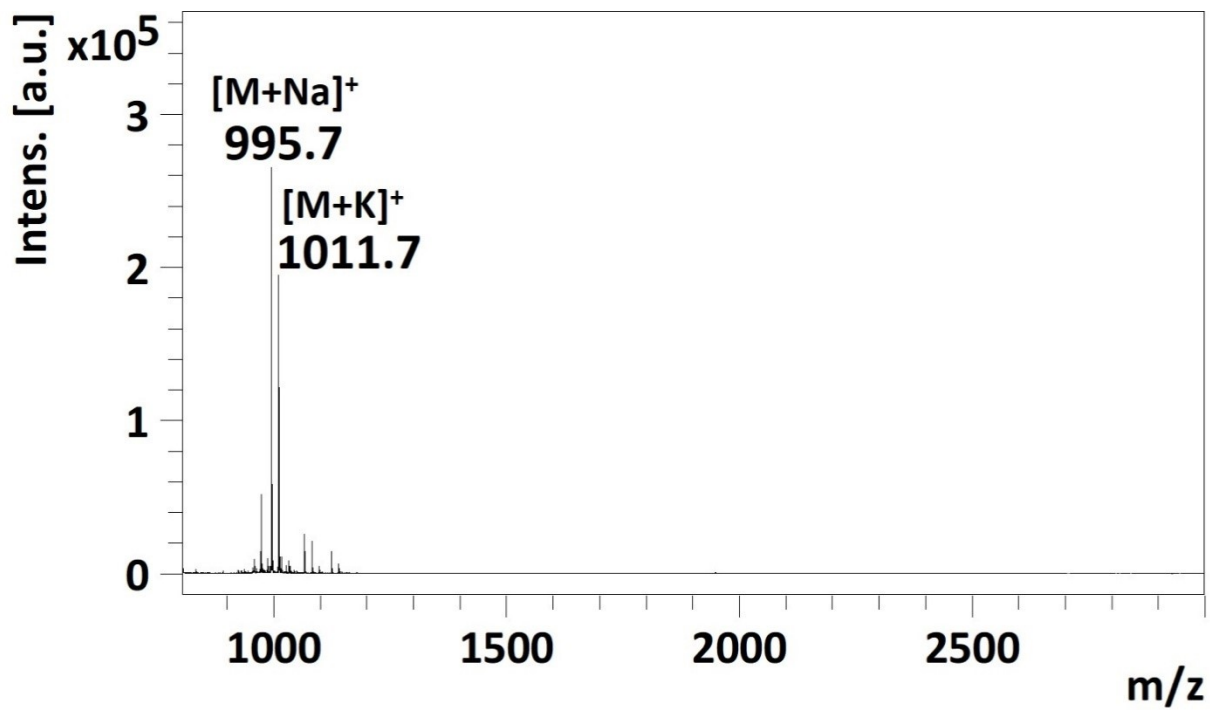

**Figure S4.** MALDI-TOF mass spectrum of peptide 1. Calculated mass: 972.1 Da; Observed mass: 995.7 Da ([M+Na]<sup>+</sup>) and 1011.7 Da ([M+K]<sup>+</sup>)



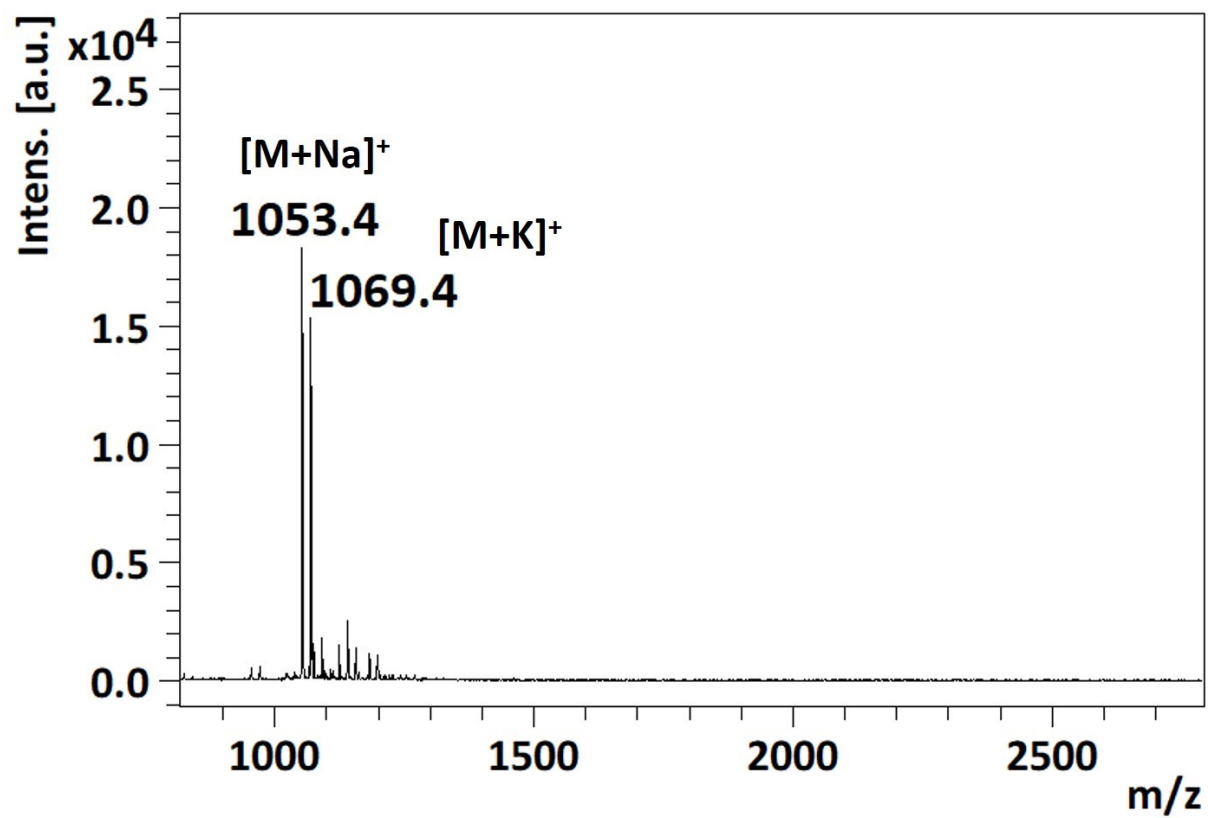

**Figure S5.** MALDI-TOF mass spectrum of peptide 2. Calculated mass: 1030.3Da; Observed mass: 1053.4 Da ( $[M+Na]^+$ ) and 1069.4 Da ( $[M+K]^+$ )

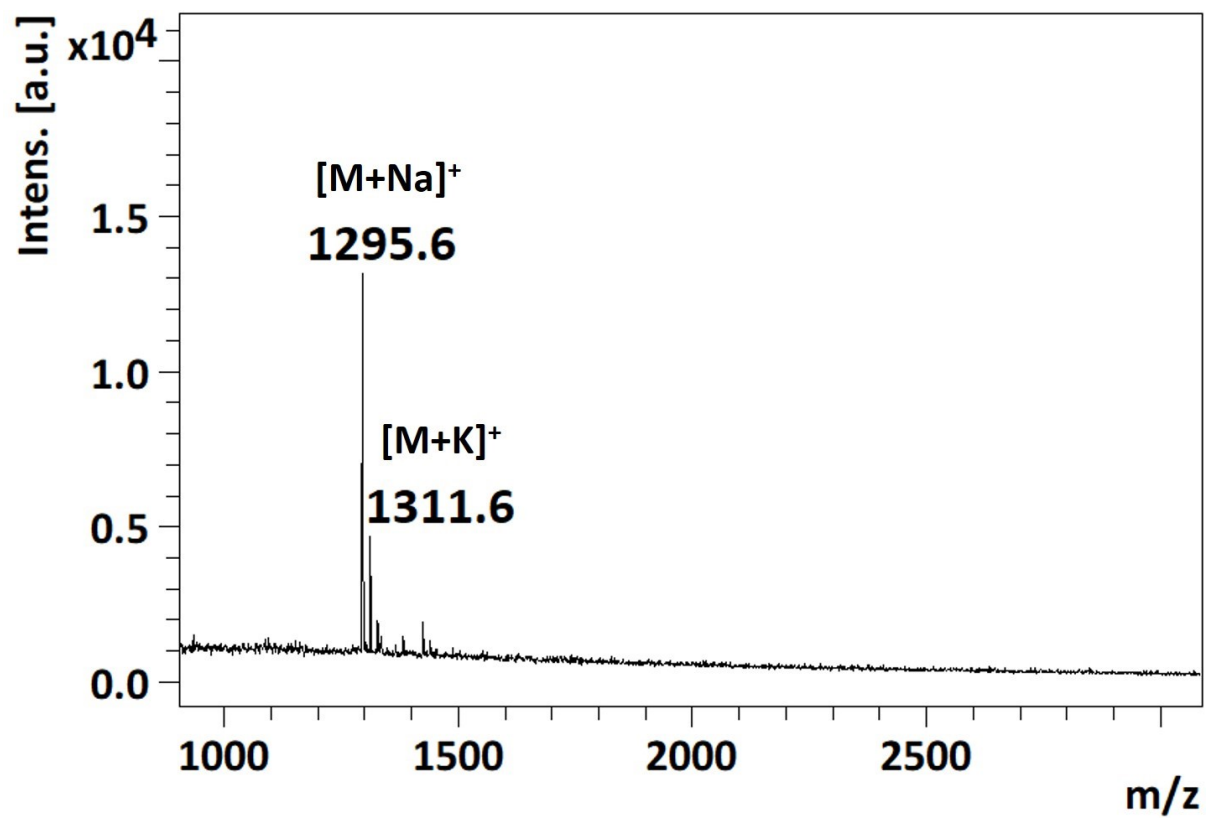

**Figure S6.** MALDI-TOF mass spectrum of peptide 3. Calculated mass: 1273.6 Da; Observed mass: 1295.6 Da ([M+Na]<sup>+</sup>) and 1311.6 Da ([M+K]<sup>+</sup>).

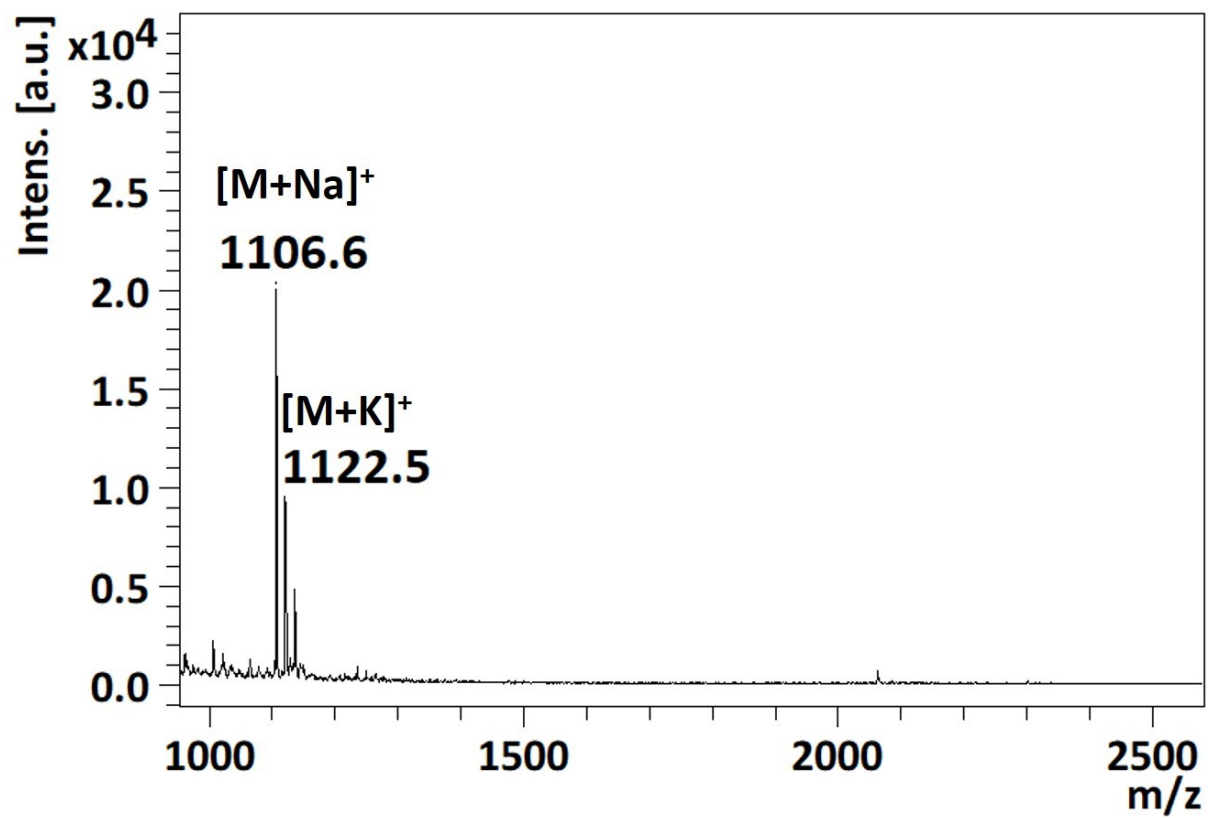

**Figure S7.** MALDI-TOF mass spectrum of peptide 4. Calculated mass: 1084.4 Da; Observed mass: 1106.6 Da ([M+Na]<sup>+</sup>) and 1122.5 Da ([M+K]<sup>+</sup>).

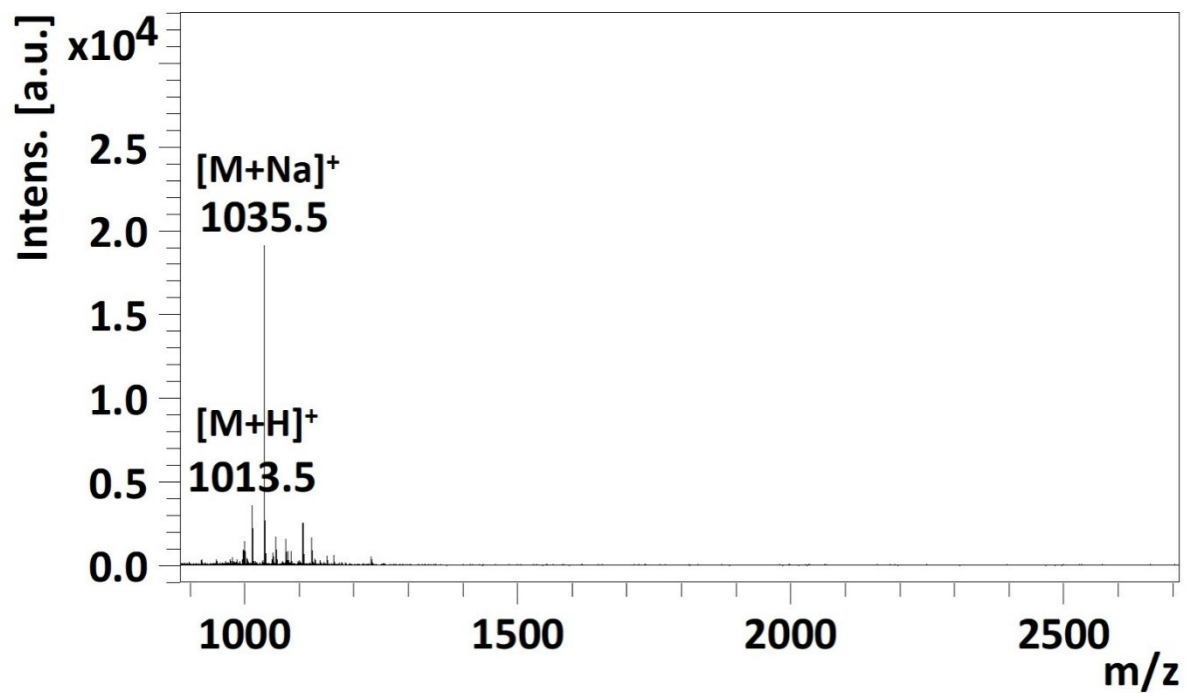

**Figure S8.** MALDI-TOF mass spectrum of peptide 5. Calculated mass: 1012.5 Da; Observed mass: 1013.5 Da ( $[M+H]^+$ ) and 1035.5 Da ( $[M+Na]^+$ )

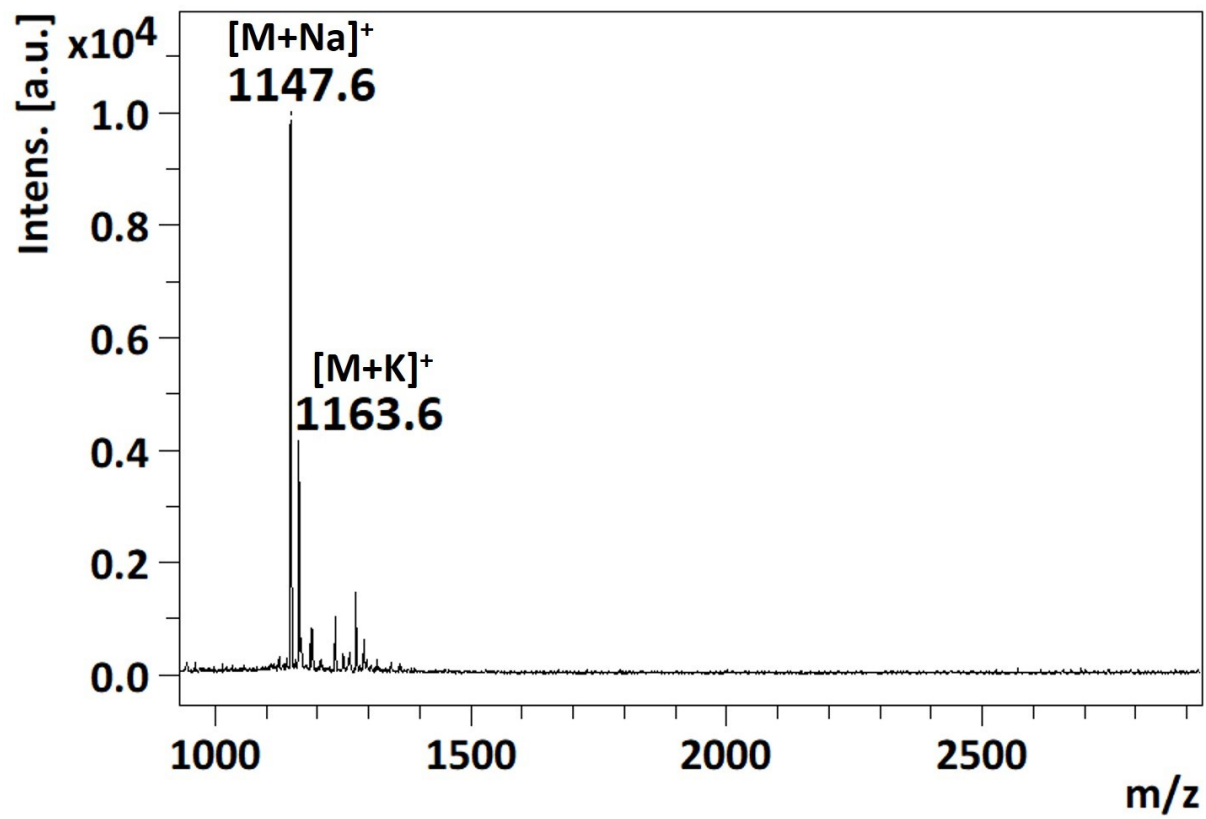

**Figure S9.** MALDI-TOF mass spectrum of peptide 6. Calculated mass: 1125.4 Da; Observed mass: 1147.6 Da ( $[M+Na]^+$ ) and 1163.6 Da ( $[M+K]^+$ )

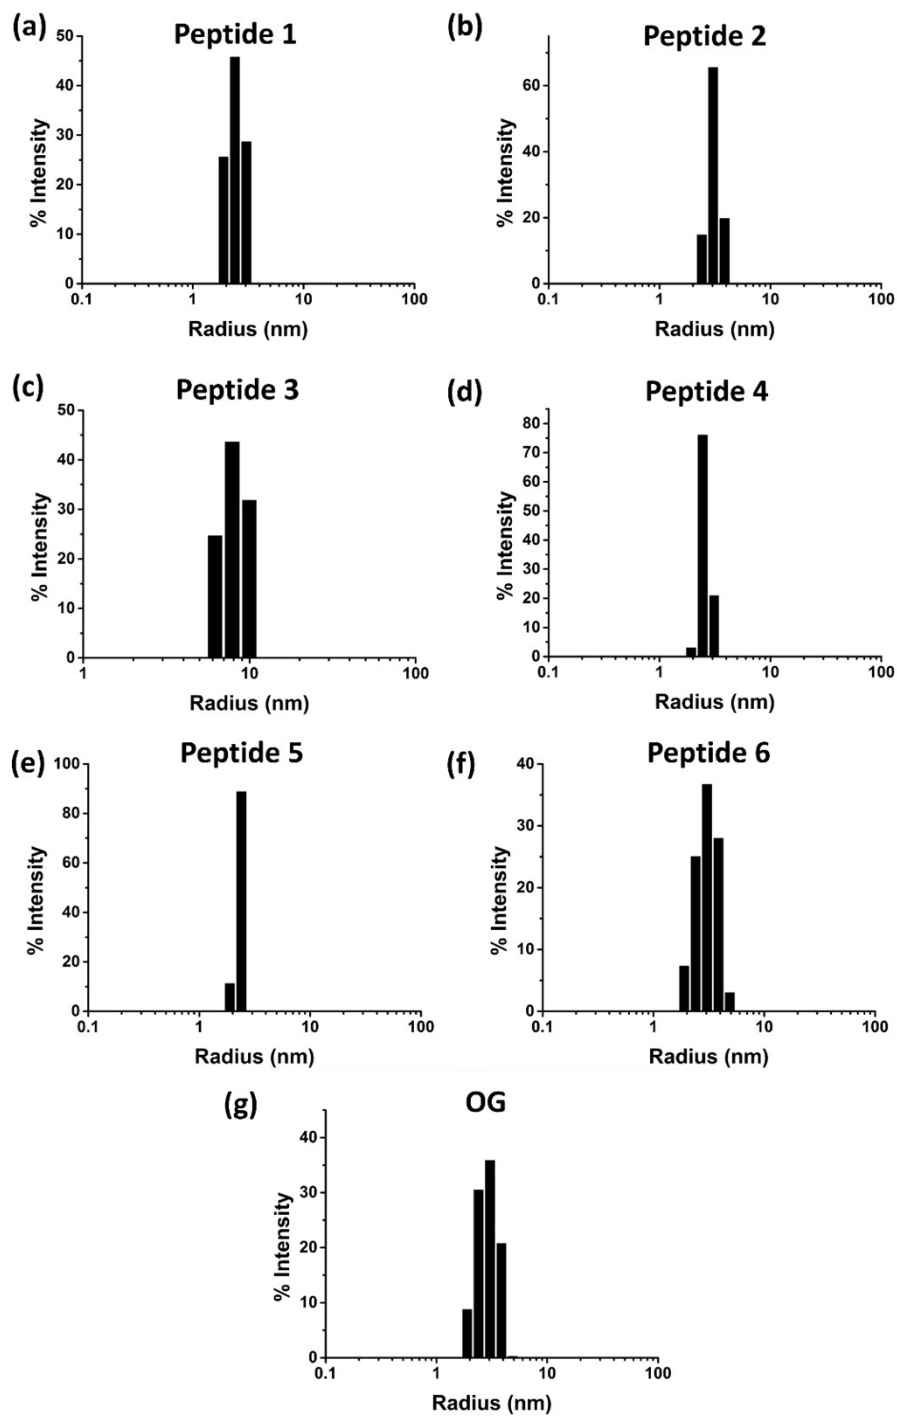

**Figure S10.** Histogram of particle size distributions of self-assembled detergent peptides 1 - 6 and OG (Octyl- $\beta$ -D-Glucopyranoside, commercial detergent) obtained from DLS studies in buffer (100 mM Tris and 40 mM NaCl, pH 7.4). The average hydrodynamic radius of self-assembled peptides 1 – 6 and OG are  $2.3 \pm 0.3$  nm,  $2.8 \pm 0.9$  nm,  $8.1 \pm 0.1$  nm,  $1.8 \pm 0.6$  nm,  $1.7 \pm 0.9$  nm,  $2.6 \pm 0.7$  nm and  $2.7 \pm 0.1$  nm, respectively. The hydrodynamic radius of self-assembled peptides 1, 2 and 6 are having comparable values with commercial detergent, OG. The hydrodynamic radius of self-assembled peptide 3 has large value. The average radius are mean  $\pm$  SD of triplicate samples.

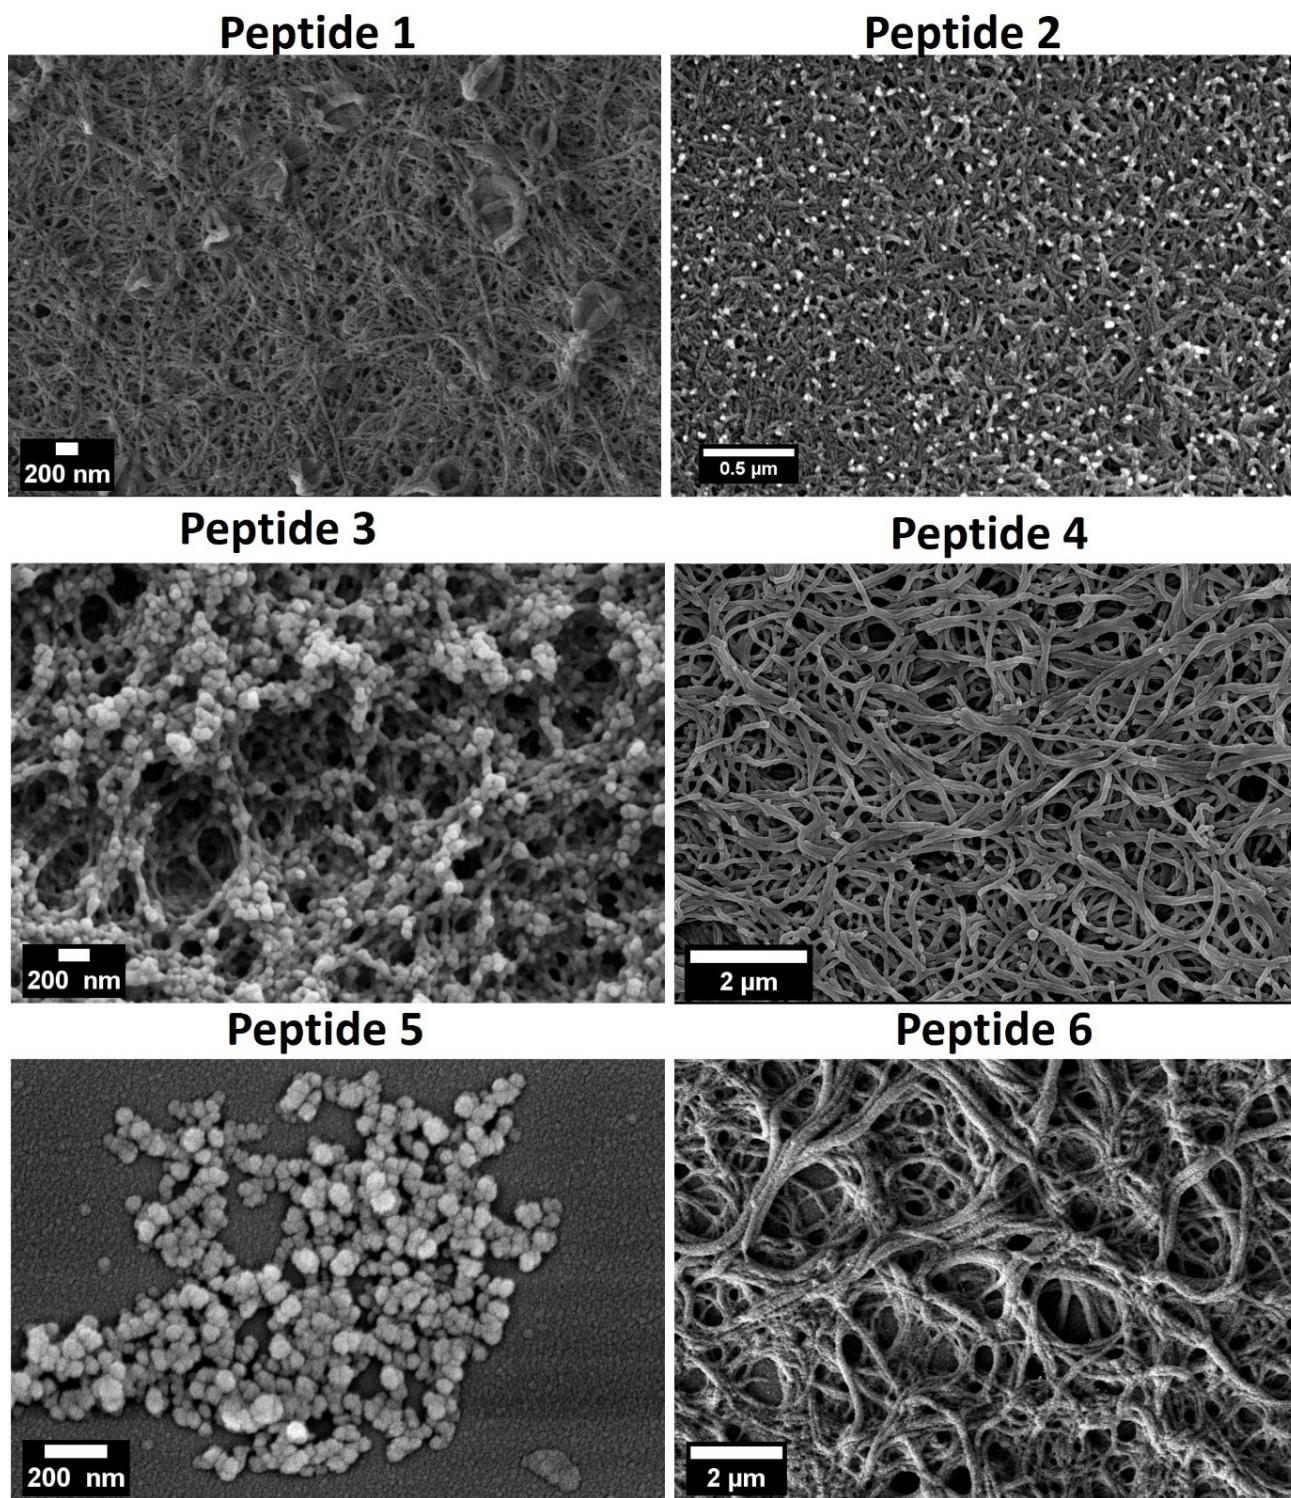

**Figure S11.** FE-SEM images of self-assembled detergent peptides. The average width of fibrillar peptides are as follows; Peptide 1:  $48.6 \pm 8.4$  nm, Peptide 2:  $31.9 \pm 4.1$  nm, Peptide 3:  $41.8 \pm 11.4$  nm, Peptide 4:  $75.5 \pm 16.8$  nm, Peptide 5:  $41.9 \pm 5.4$  nm, and Peptide 6:  $78.8 \pm 13.6$  nm. The average diameters are mean  $\pm$  SD of triplicate samples.

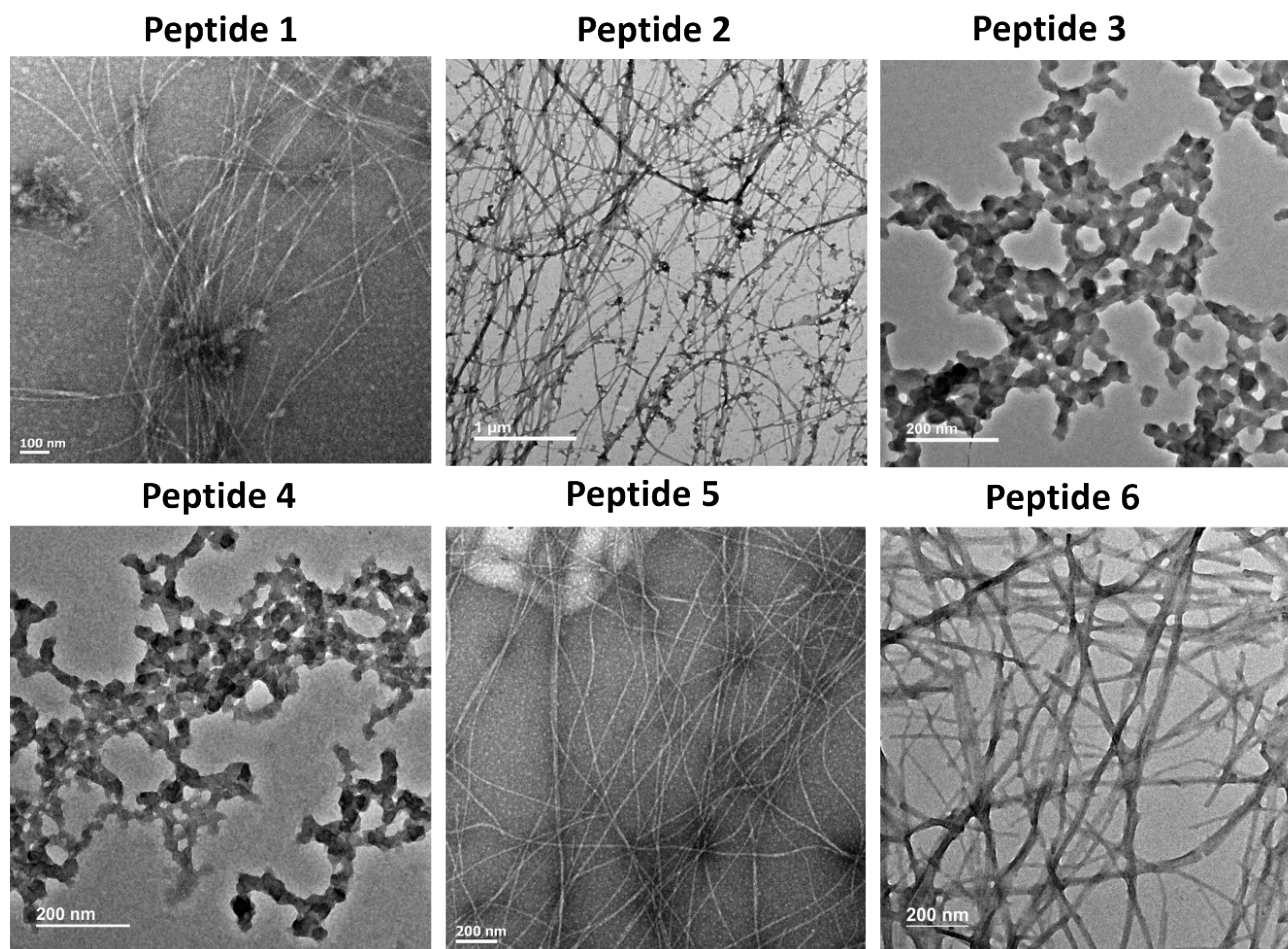

**Figure S12.** HR-TEM images of self-assembled detergent peptides. The average width of fibrillar peptides are as follows; peptide 1:  $15.5 \pm 4.2$  nm, peptide 2:  $43.6 \pm 11.7$  nm, peptide 3:  $38.7 \pm 11.9$  nm, peptide 4:  $28.3 \pm 5.4$  nm, peptide 5:  $14.7 \pm 2.2$  nm and peptide 6:  $26.3 \pm 6.2$  nm. The average diameters are mean  $\pm$  SD of triplicate samples.



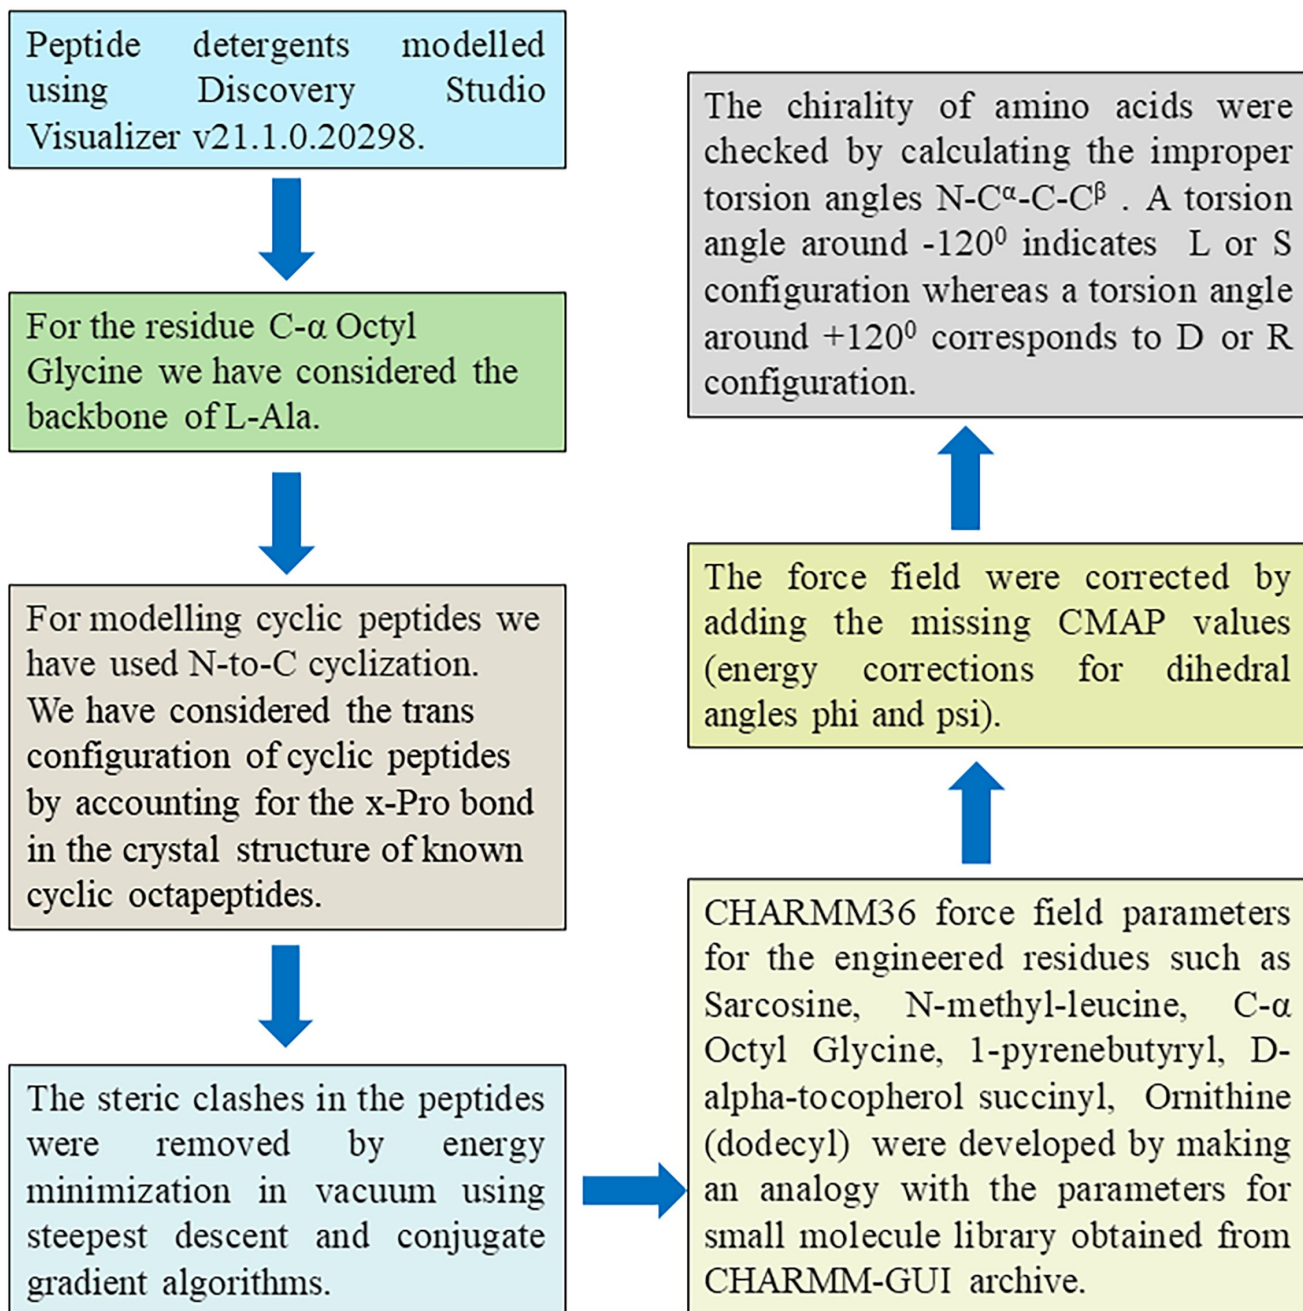

**Figure S13.** Flowchart depicting the strategies involved in the development of CHARMM36 force field parameters for unnatural amino acid residues

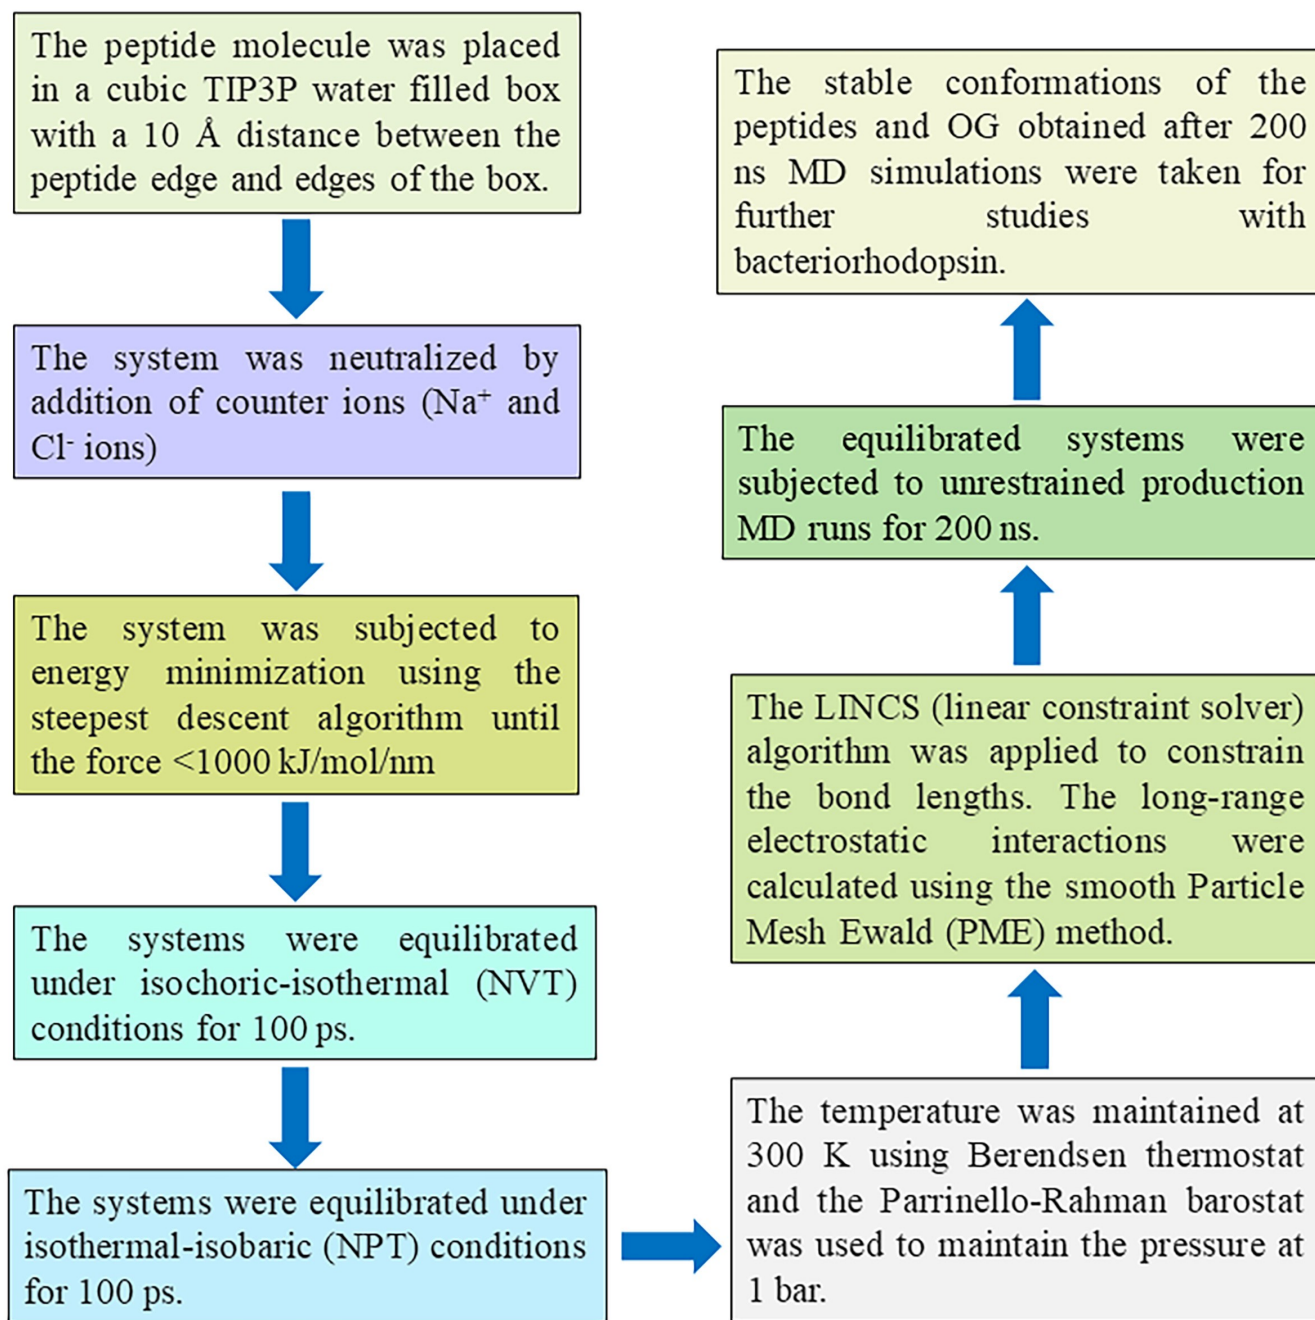

**Figure S14.** Flowchart showing the step-wise protocol for MD simulation of detergent peptides.

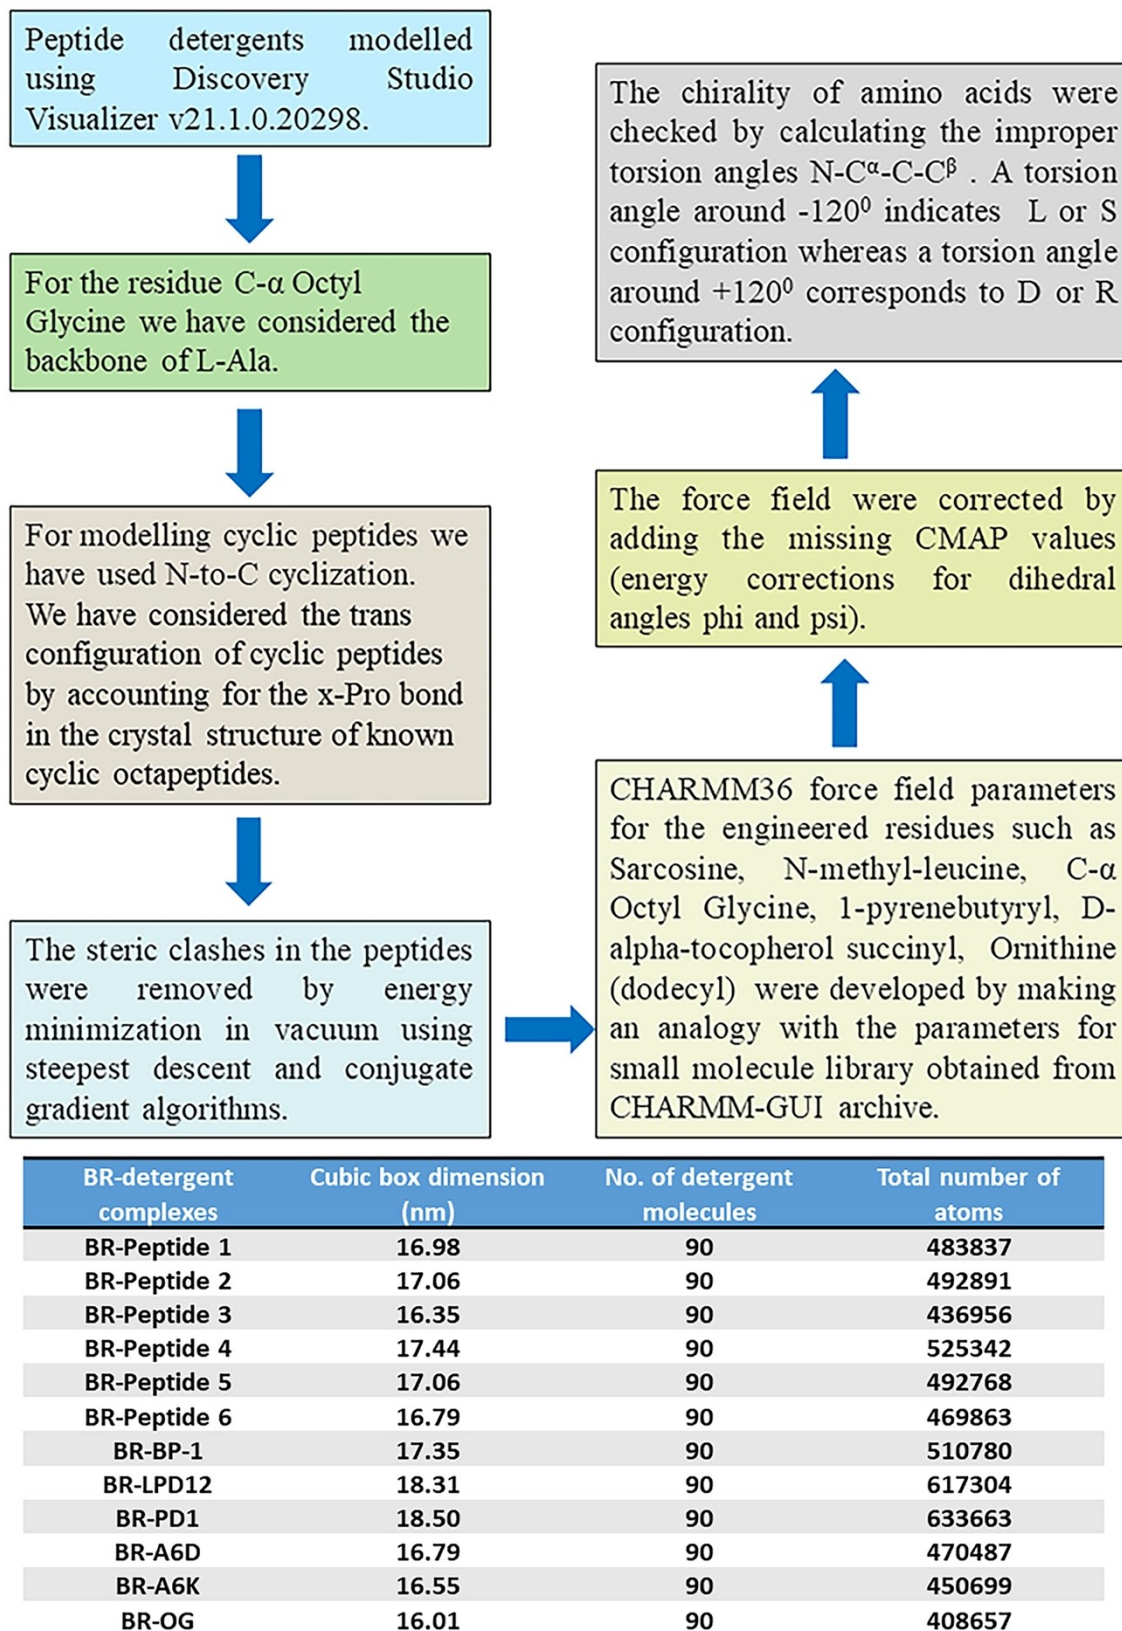

**Figure S15.** Flowchart showing the step-wise protocol for MD simulation of detergent encased BR systems.

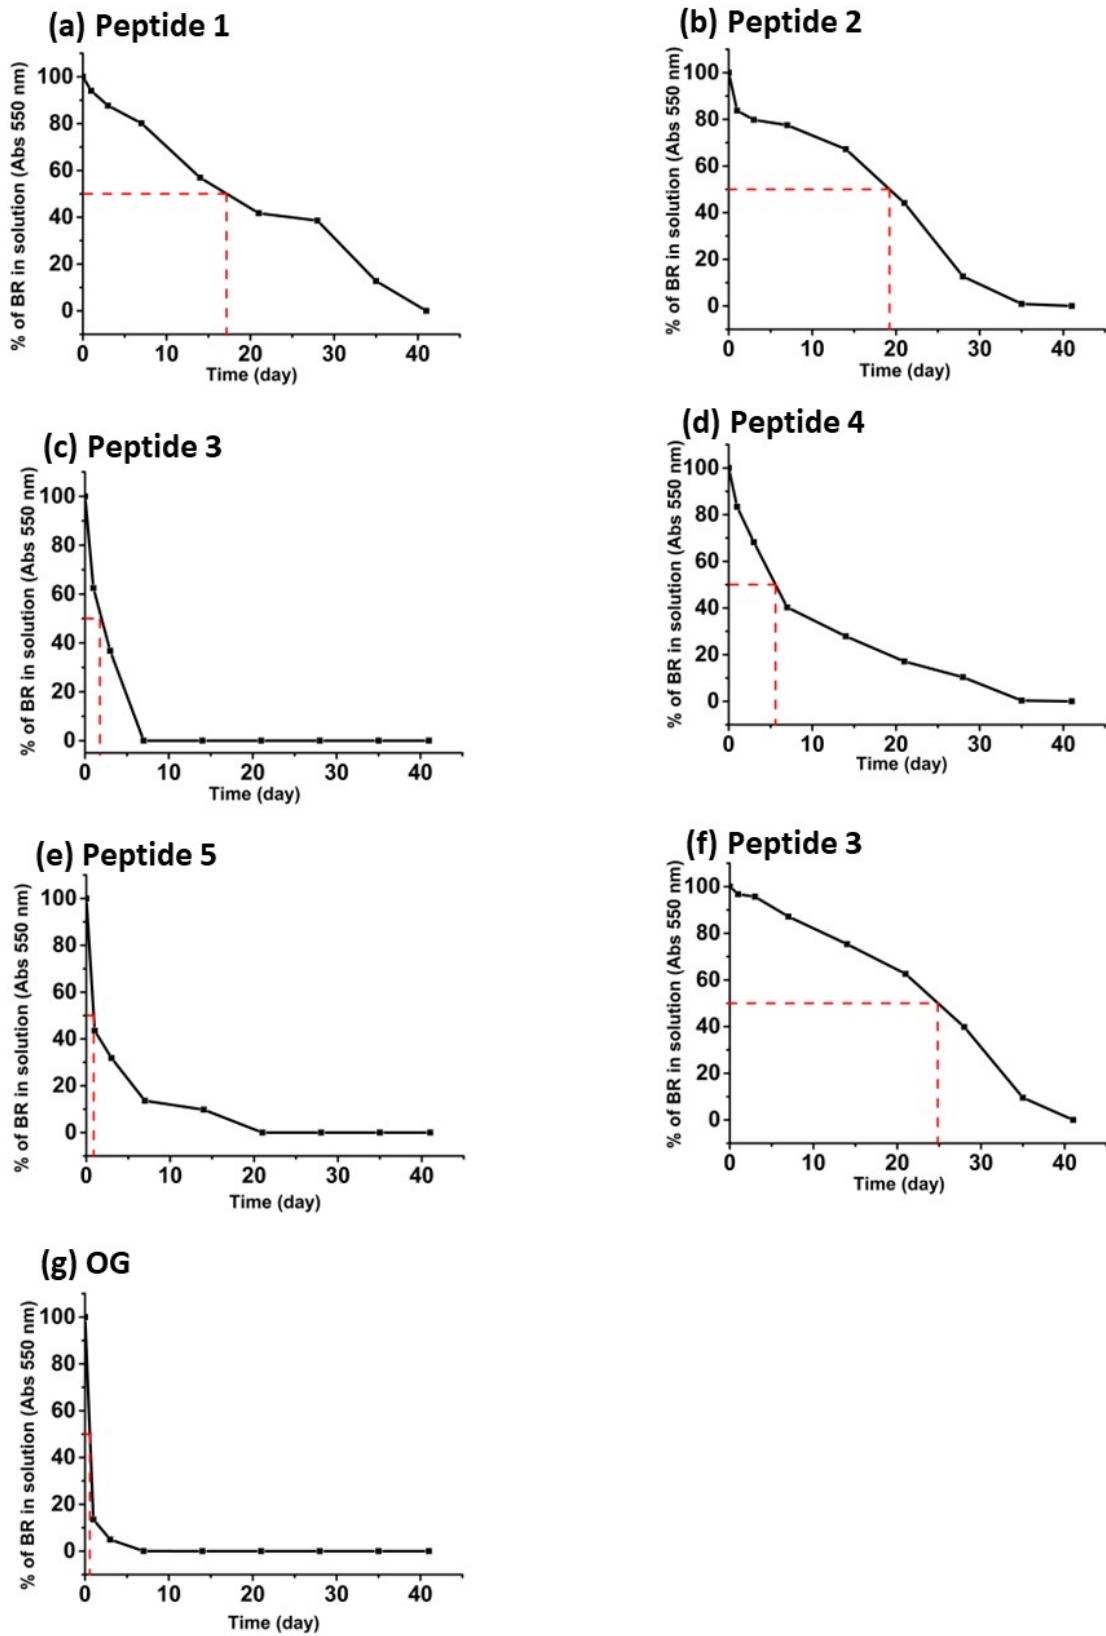

**Figure S16.** Plot of half-life determination of BR in presence of peptide detergents 1-6 and commercial detergent (OG).

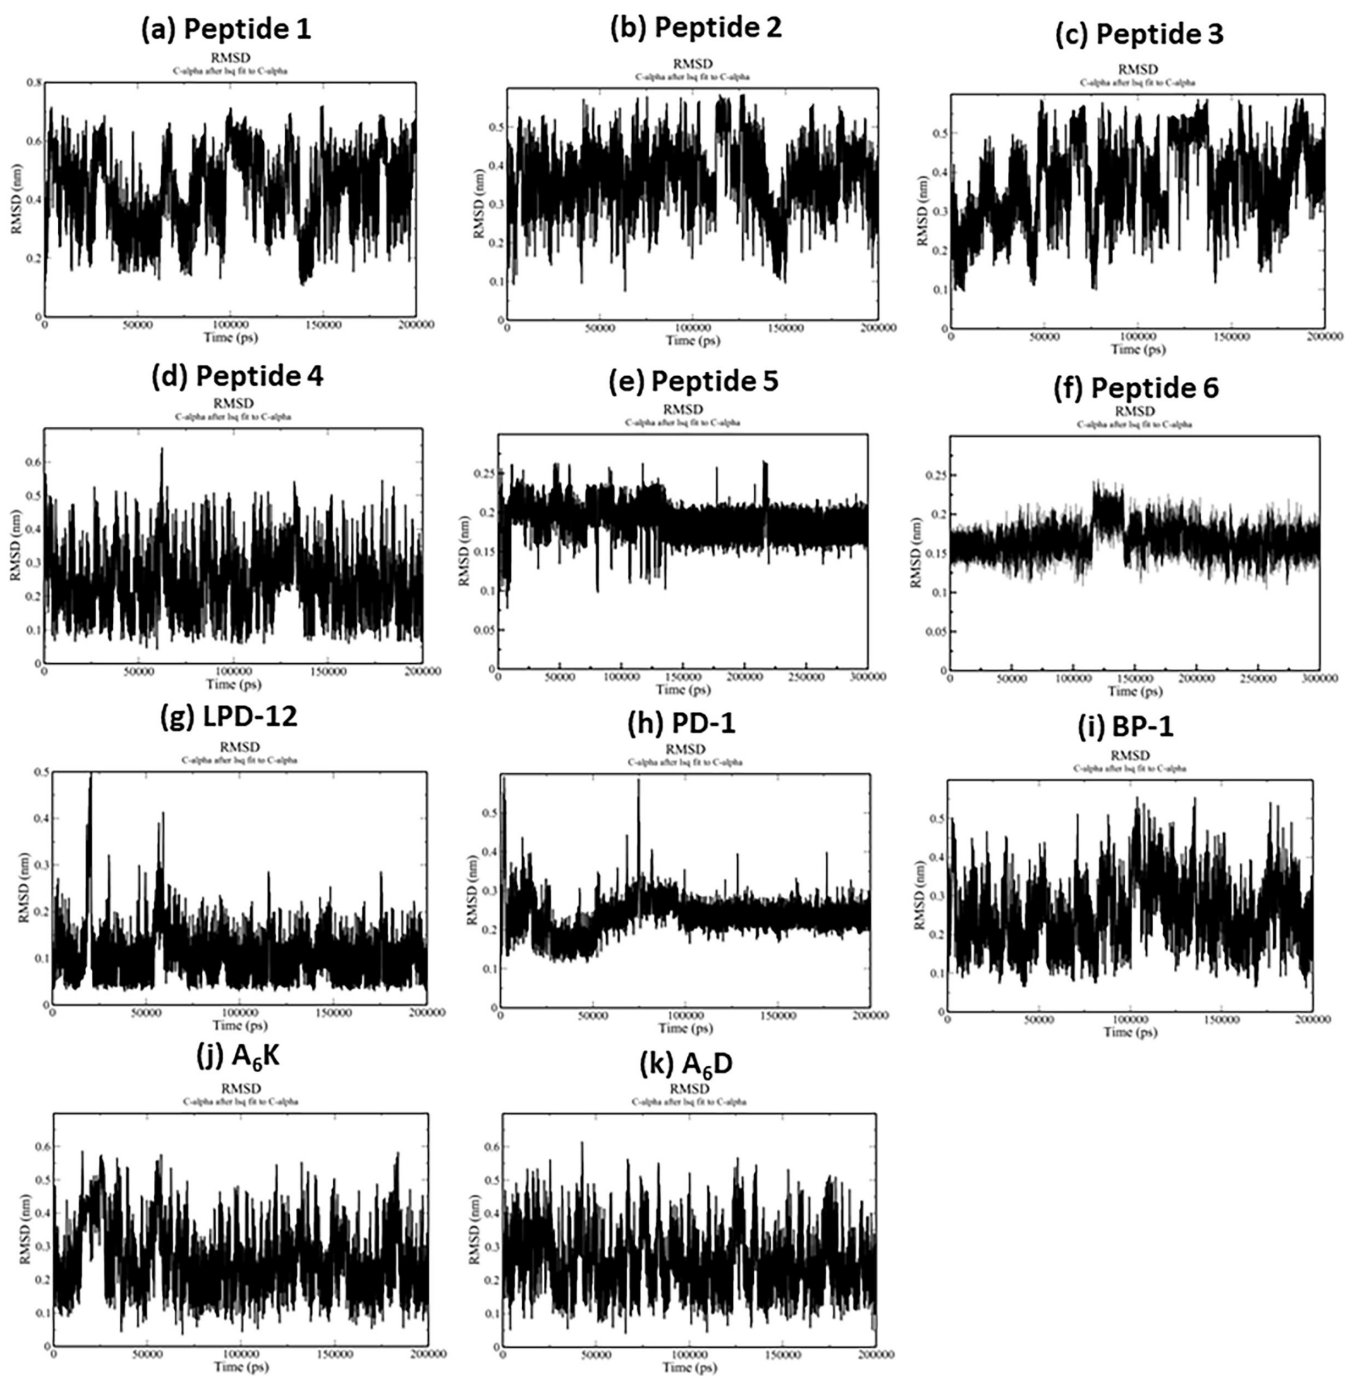

**Figure S17.** RMSD Plot of C $\alpha$  atoms of peptide detergents. Peptides 1-6 are our engineered peptide detergents whereas peptides D1-D5 are peptides reported by other groups.

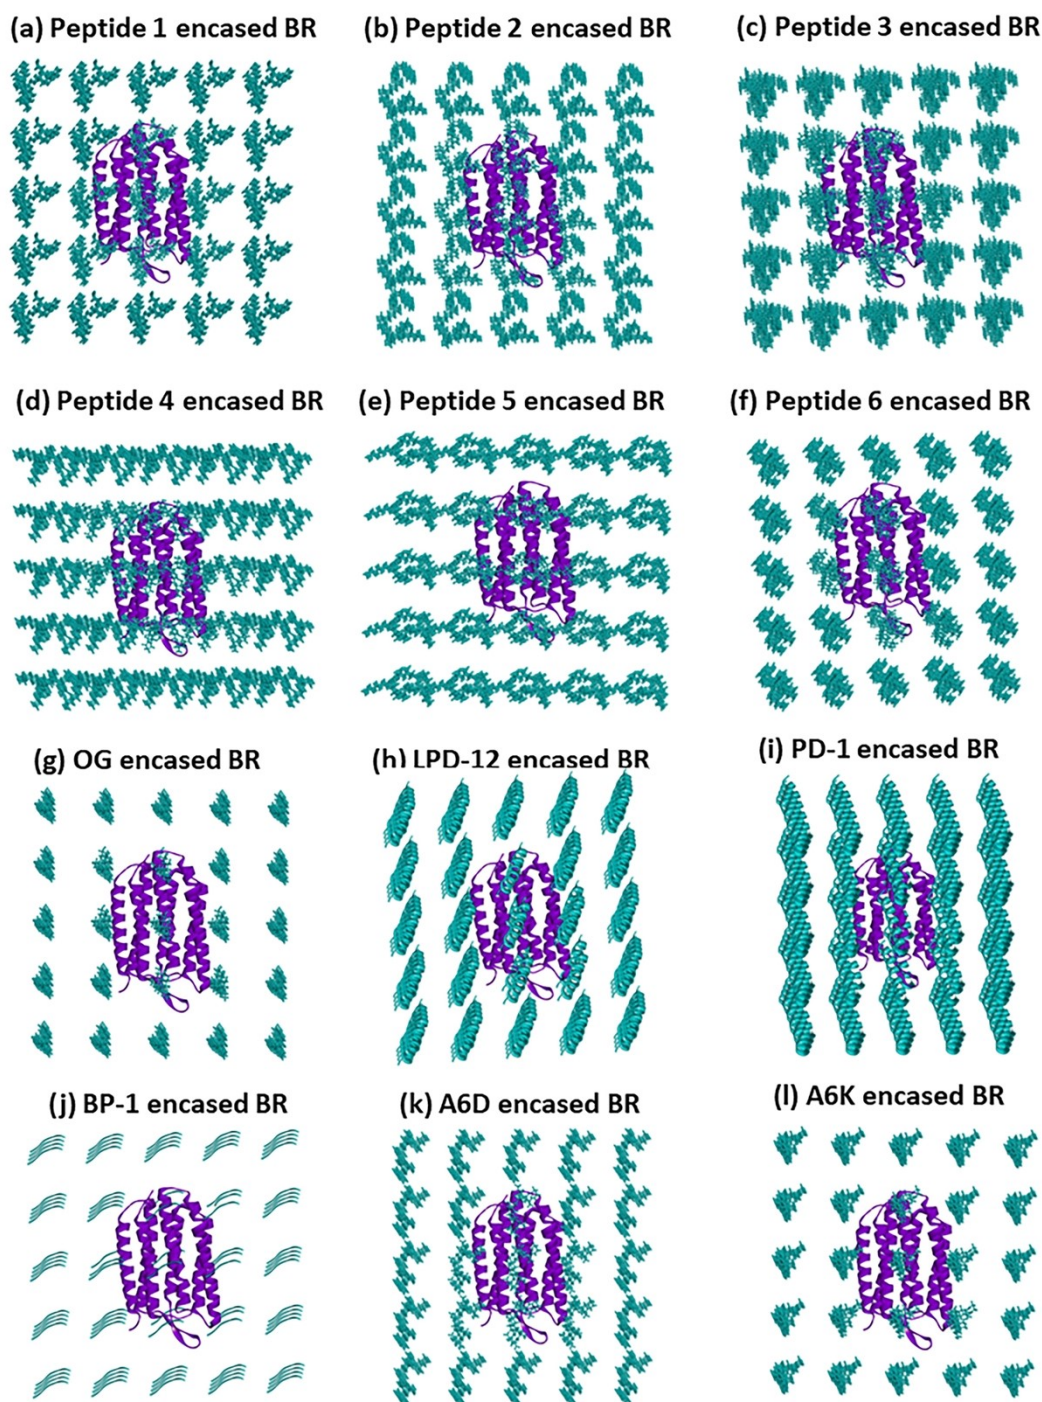

**Figure S18.** Initial models of detergent-encased BR systems at time  $t=0$  ns of MD simulations. Each box contains ninety detergent molecules, wherein each detergent molecule is  $20 \text{ \AA}$  apart from the other and BR is positioned at the centre of the box. The detergent molecules are displayed as green stick and ribbon models while BR is represented as purple ribbons. Note that (a) to (f) represents our designed facial lipopeptide detergents encasing BR. (g) OG is the commercial detergent encasing BR and (h) to (l) corresponds to control group detergent peptides reported by other groups.

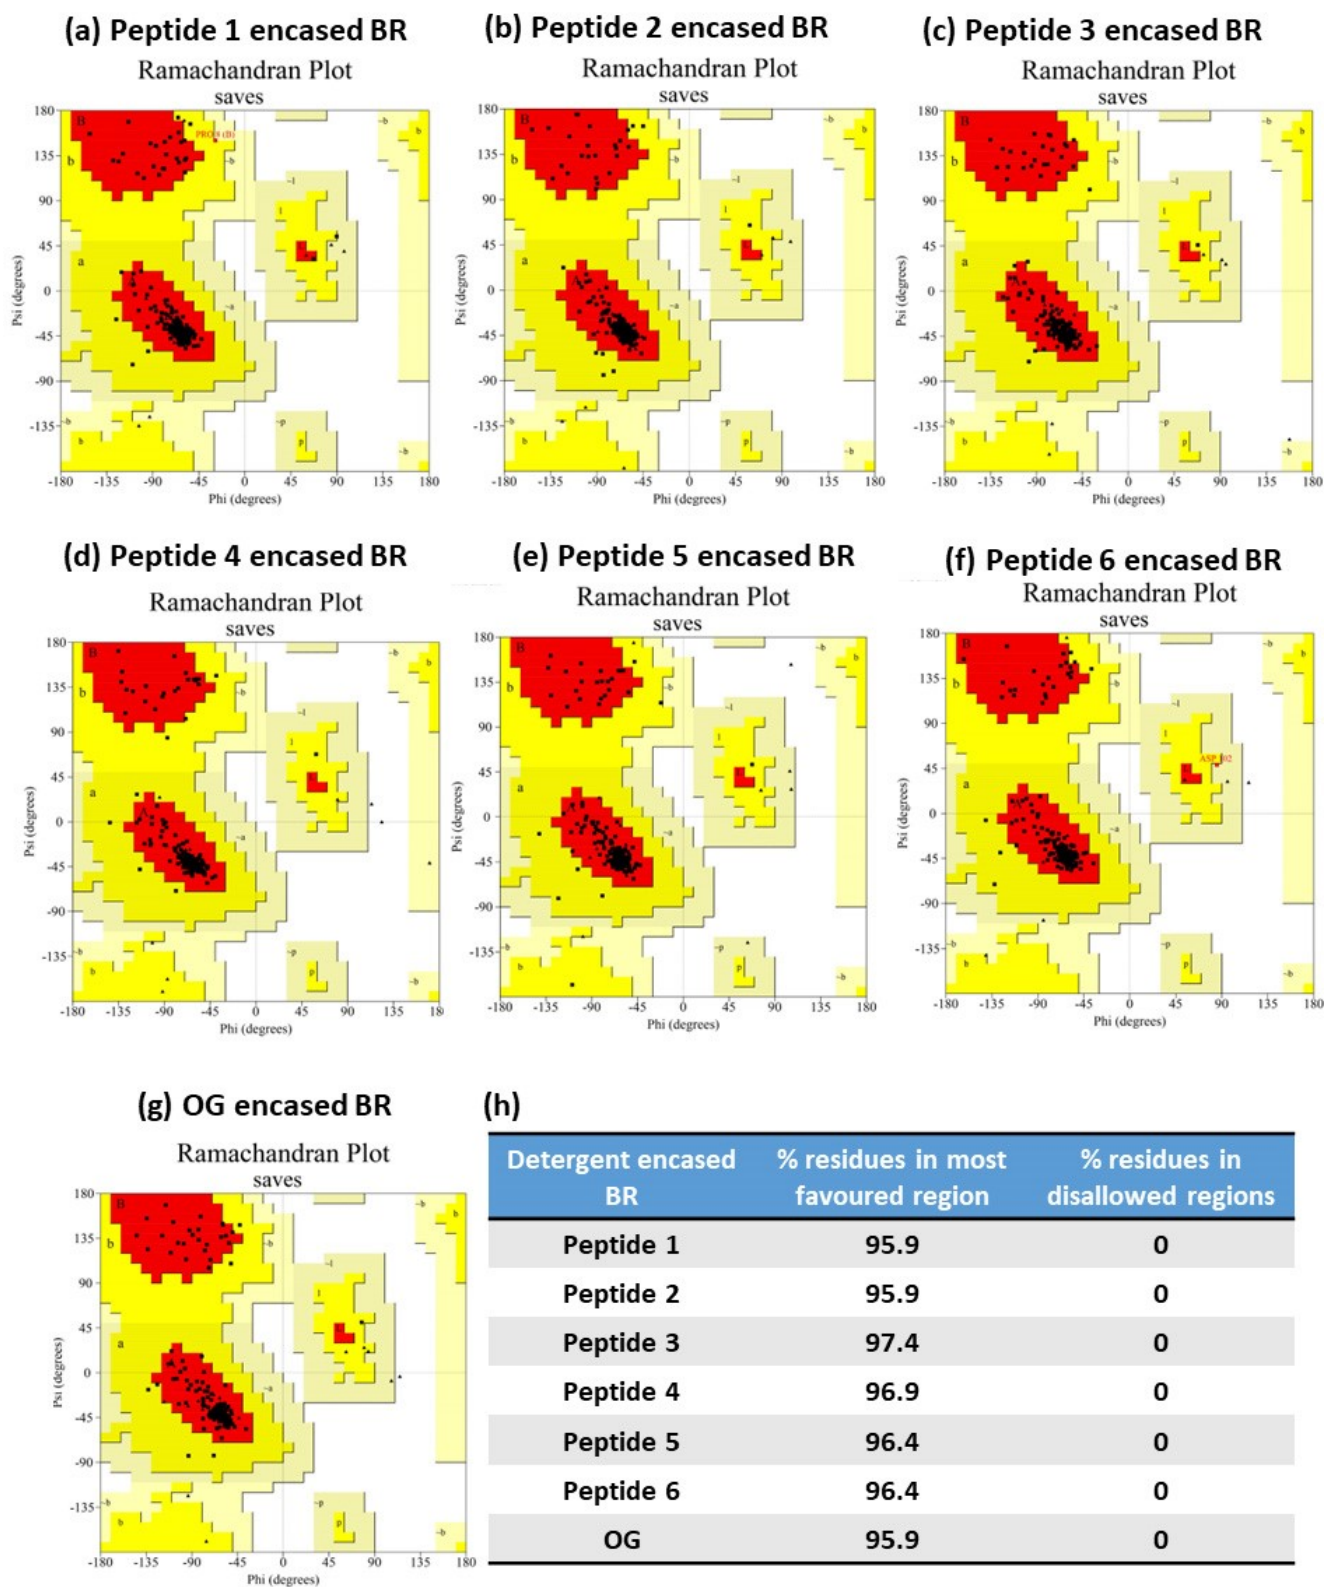

**Figure S19.** Analyses of secondary structure changes in BR by monitoring backbone dihedral angles- phi and psi of our engineered detergent encased BR systems. Figures (a) to (g) show the Ramachandran map of BR encased by detergent molecules. most favored regions (red), additionally allowed regions (yellow),

generously allowed regions (beige) and disallowed regions (white). Figure (h) shows the distribution of residues in the favored and disallowed regions of Ramachandran map.



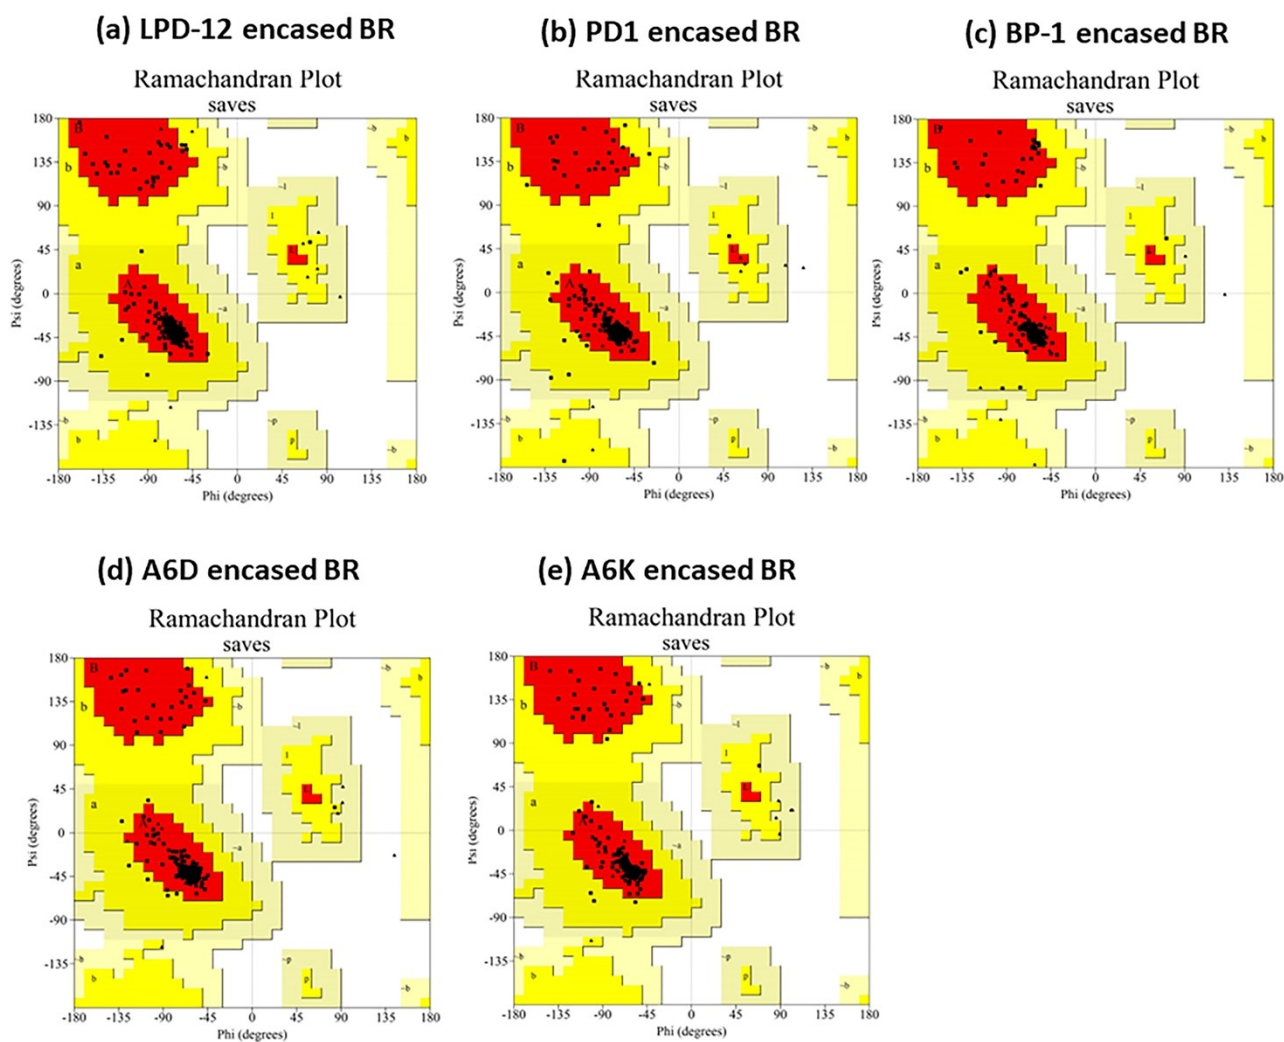

(f)

| Peptide detergent encased BR | % residues in most favoured region | % residues in disallowed regions |
|------------------------------|------------------------------------|----------------------------------|
| LPD-12                       | 97.4                               | 0                                |
| PD1                          | 93.3                               | 0                                |
| BP-1                         | 96.4                               | 0                                |
| A6D                          | 95.9                               | 0                                |
| A6K                          | 97.4                               | 0                                |

**Figure S20.** Analyses of secondary structure changes in BR by monitoring backbone dihedral angles-phi and psi of reported detergent encased BR systems. Figures (a) to (g) show the Ramachandran map of BR encased by detergent molecules. most favored regions (red), additionally allowed regions (yellow), generously allowed regions (beige) and disallowed regions (white). Figure (h) shows the distribution of residues in the favored and disallowed regions of Ramachandran map.

### BR-Peptide 2 encased system

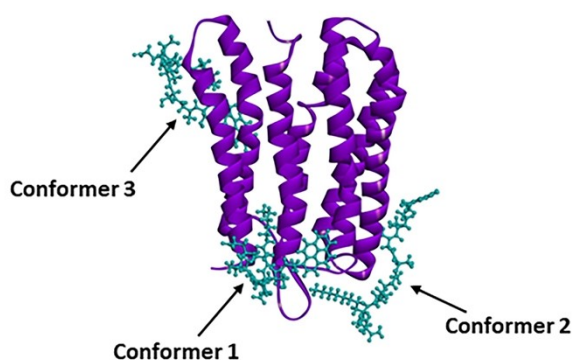

| Residues        | Dihedral angles of Conformer 1 |        |          | Dihedral angles of Conformer 2 |        |          | Dihedral angles of Conformer 3 |         |          |
|-----------------|--------------------------------|--------|----------|--------------------------------|--------|----------|--------------------------------|---------|----------|
|                 | $\phi$                         | $\psi$ | $\omega$ | $\phi$                         | $\psi$ | $\omega$ | $\phi$                         | $\psi$  | $\omega$ |
| PYRENEBUTYRYL-1 | NA                             | NA     | NA       | NA                             | NA     | NA       | NA                             | NA      | NA       |
| SER-2           | NA                             | 125.49 | NA       | NA                             | 147.14 | NA       | NA                             | 156.59  | NA       |
| SAR-3           | 73.60                          | 17.03  | -178.35  | -39.30                         | 144.39 | 179.59   | 98.35                          | 179.69  | -179.49  |
| SER-4           | -157.76                        | 154.45 | -177.67  | -151.99                        | 148.08 | -176.32  | -139.71                        | 162.20  | 164.20   |
| SAR-5           | -63.27                         | -46.67 | -171.95  | 114.15                         | 141.50 | -173.79  | 59.95                          | -176.25 | -172.57  |
| GLU-6           | -79.40                         | -24.44 | -175.95  | -145.21                        | 164.47 | -169.41  | -44.15                         | 149.21  | 176.56   |
| OCTYLGLY-7      | -90.60                         | -39.49 | -178.64  | -109.33                        | 1.22   | -168.60  | -94.77                         | 77.67   | 164.64   |
| GLU-8           | -83.06                         | NA     | 174.39   | -83.72                         | NA     | -174.25  | -76.31                         | NA      | -169.53  |

**Figure S21.** The dihedral angles of BR-Peptide 2 encased system. Note that we have tabulated the dihedral angles of Peptide 2 in three different conformations (conformer 1, conformer 2 and conformer 3).

### BR-Peptide 6 encased system

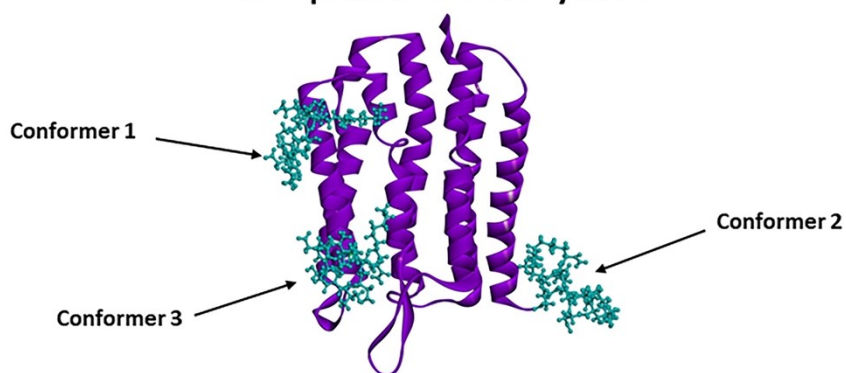

| Residues   | Dihedral angles of Conformer 1 |         |          | Dihedral angles of Conformer 2 |         |          | Dihedral angles of Conformer 3 |         |          |
|------------|--------------------------------|---------|----------|--------------------------------|---------|----------|--------------------------------|---------|----------|
|            | $\phi$                         | $\psi$  | $\omega$ | $\phi$                         | $\psi$  | $\omega$ | $\phi$                         | $\psi$  | $\omega$ |
| D-SER-1    | 112.72                         | -168.67 | 172.05   | 81.40                          | -134.75 | 152.19   | 72.04                          | -158.33 | 167.51   |
| N-ME-LEU-2 | -82.64                         | 20.07   | -176.40  | -85.45                         | 48.62   | 178.51   | -61.86                         | 137.28  | 176.02   |
| D-ASP-3    | 103.44                         | 174.55  | -170.93  | 59.34                          | 44.95   | -170.99  | 105.04                         | -20.24  | 177.50   |
| OCTYLGLY-4 | -56.86                         | 131.79  | -166.31  | -157.13                        | -178.51 | 179.29   | -99.57                         | -18.34  | 179.66   |
| D-SER-5    | 143.27                         | 80.26   | 169.34   | 51.72                          | 61.13   | -177.42  | 64.25                          | 39.55   | -177.30  |
| N-ME-LEU-6 | -88.52                         | 16.78   | 159.17   | -94.07                         | 16.41   | 175.97   | -113.22                        | 119.89  | -156.19  |
| D-ASP-7    | 79.33                          | 19.05   | 166.36   | 71.02                          | 28.87   | -177.40  | 106.59                         | -125.76 | -175.13  |
| GLU-8      | -91.05                         | -48.11  | -175.77  | -114.21                        | 170.73  | 166.37   | -79.08                         | 61.34   | -172.09  |

**Figure S22.** The dihedral angles of BR-Peptide 6 encased system. Note that we have tabulated the dihedral angles of Peptide 6 in three different conformations (conformer 1, conformer 2 and conformer 3).

### BR-BP-1 encased system

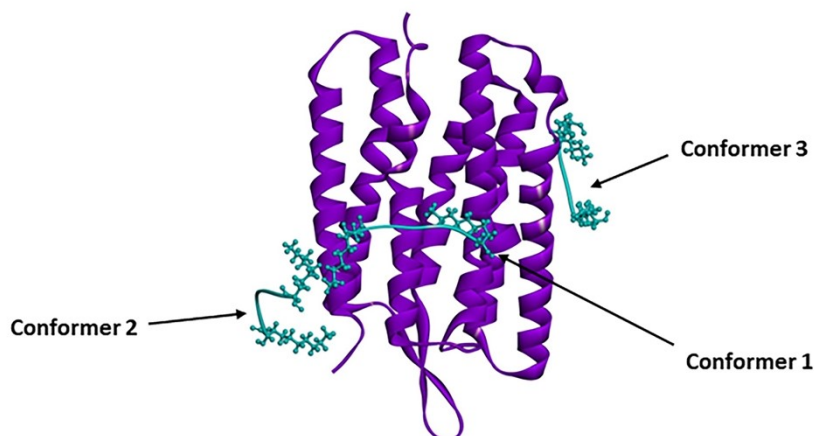

| Residues   | Dihedral angles of Conformer 1 |        |          | Dihedral angles of Conformer 1 |        |          | Dihedral angles of Conformer 1 |        |          |
|------------|--------------------------------|--------|----------|--------------------------------|--------|----------|--------------------------------|--------|----------|
|            | $\phi$                         | $\psi$ | $\omega$ | $\phi$                         | $\psi$ | $\omega$ | $\phi$                         | $\psi$ | $\omega$ |
| OCTGLY-1   | NA                             | 137.58 | NA       | NA                             | 148.59 | NA       | NA                             | 161.82 | NA       |
| SER-2      | -161.15                        | 156.44 | -175.42  | -108.50                        | 131.16 | -175.74  | -91.06                         | 17.25  | -173.83  |
| LEU-3      | -133.01                        | 124.72 | -158.37  | -107.70                        | 10.04  | -176.92  | -160.55                        | 172.03 | 178.69   |
| SER-4      | -83.49                         | 136.06 | 171.17   | -106.82                        | 137.41 | 154.85   | -159.46                        | 141.43 | 177.36   |
| N-ME-LEU-5 | -94.14                         | 83.95  | -176.01  | -113.43                        | 113.62 | 162.50   | -94.86                         | 179.62 | 167.22   |
| ASP-6      | -137.12                        | 125.80 | -165.75  | -99.90                         | 132.00 | 171.15   | -88.64                         | 93.24  | 168.44   |
| OCTGLY-7   | -104.23                        | 2.77   | -179.64  | -77.95                         | -20.56 | -178.00  | -171.40                        | 160.72 | 179.58   |
| ASP-8      | -104.03                        | NA     | -167.44  | -68.83                         | NA     | 177.32   | -100.89                        | NA     | 172.44   |

**Figure S23.** The dihedral angles of BR-BP-1 encased system. Note that we have tabulated the dihedral angles of BP-1 in three different conformations (conformer 1, conformer 2 and conformer 3).

### BR-LPD-12 encased system

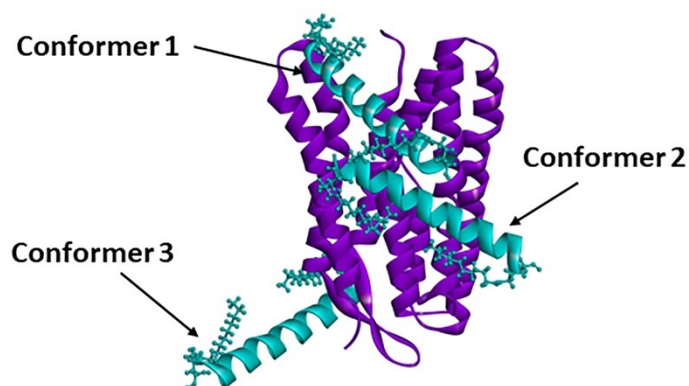

| Residues | Dihedral angles of Conformer 1 |        |          | Dihedral angles of Conformer 2 |        |          | Dihedral angles of Conformer 3 |        |          |
|----------|--------------------------------|--------|----------|--------------------------------|--------|----------|--------------------------------|--------|----------|
|          | $\phi$                         | $\psi$ | $\omega$ | $\phi$                         | $\psi$ | $\omega$ | $\phi$                         | $\psi$ | $\omega$ |
| ALA-1    | NA                             | 145.04 | NA       | NA                             | -41.05 | NA       | NA                             | 148.23 | NA       |
| ORL-2    | -65.62                         | -37.78 | -168.59  | -64.89                         | -41.04 | -178.96  | -52.78                         | -45.19 | 170.57   |
| ALA-3    | -63.11                         | -39.90 | 173.81   | -65.54                         | -43.02 | 175.83   | -58.10                         | -42.22 | 176.09   |
| GLU-4    | -65.78                         | -39.97 | 178.55   | -65.78                         | -39.97 | 178.55   | -61.73                         | -46.22 | 172.76   |
| ALA-5    | -64.59                         | -36.28 | 171.09   | -66.91                         | -37.57 | 175.89   | -58.87                         | -43.85 | 169.76   |
| ALA-6    | -56.68                         | -49.66 | 162.66   | -55.67                         | -37.71 | 172.45   | -65.55                         | -39.80 | 177.86   |
| GLU-7    | -66.92                         | -41.71 | -177.63  | -70.33                         | -43.53 | -179.84  | -49.47                         | -48.91 | 168.90   |
| LYS-8    | -67.65                         | -39.54 | 172.75   | -58.09                         | -37.15 | 172.70   | -62.17                         | -46.39 | -179.56  |
| ALA-9    | -58.87                         | -38.01 | 167.57   | -66.47                         | -52.10 | 171.23   | -52.16                         | -42.39 | 169.67   |
| ALA-10   | -63.93                         | -42.38 | 171.03   | -56.09                         | -39.52 | 179.33   | -67.29                         | -45.85 | -174.80  |
| LYS-11   | -58.58                         | -49.11 | 168.88   | -72.27                         | -30.03 | 176.40   | -58.42                         | -40.95 | 170.82   |
| TYR-12   | -58.82                         | -44.41 | 177.84   | -73.31                         | -43.72 | 175.94   | -50.53                         | -50.90 | 177.39   |
| ALA-13   | -59.00                         | -47.67 | 174.65   | -54.56                         | -46.97 | 174.96   | -80.90                         | -29.44 | -170.44  |
| ALA-14   | -63.49                         | -42.40 | -177.29  | -61.54                         | -42.70 | 176.39   | -63.62                         | -59.18 | 178.19   |
| GLU-15   | -72.99                         | -35.46 | -176.26  | -67.30                         | -29.34 | 168.25   | -56.68                         | -45.78 | 170.21   |
| ALA-16   | -61.59                         | -41.25 | 168.86   | -61.59                         | -41.25 | 168.86   | -58.30                         | -43.36 | 176.11   |
| ALA-17   | -61.94                         | -38.89 | 173.83   | -66.45                         | -40.80 | 176.05   | -61.08                         | -41.77 | 171.81   |
| GLU-18   | -62.80                         | -47.72 | 172.04   | -65.81                         | -43.58 | 178.44   | -62.80                         | -47.72 | 172.04   |
| LYS-19   | -59.66                         | -43.25 | 174.36   | -60.93                         | -42.76 | 170.66   | -61.25                         | -38.45 | 174.55   |
| ALA-20   | -62.90                         | -43.30 | 171.61   | -59.17                         | -40.94 | 170.67   | -66.85                         | -45.40 | 177.71   |
| ALA-21   | -64.30                         | -43.66 | 174.57   | -65.97                         | -40.53 | 173.25   | -64.30                         | -43.66 | 174.57   |
| LYS-22   | -83.10                         | -17.79 | -172.16  | -78.24                         | -22.32 | -175.23  | -64.13                         | -40.58 | 164.01   |
| ALA-23   | -66.67                         | -36.85 | 174.46   | -84.56                         | -20.29 | 171.54   | -62.88                         | -24.97 | 179.94   |
| ORL-24   | -95.27                         | -14.26 | 176.79   | -89.01                         | -15.57 | 165.63   | -67.81                         | -37.02 | 172.29   |
| ALA-25   | -70.17                         | NA     | 176.33   | -77.48                         | NA     | 162.86   | -83.76                         | NA     | -179.91  |

**Figure S24.** The dihedral angles of BR-LPD-12 encased system. Note that we have tabulated the dihedral angles of LPD-12 in three different conformations (conformer 1, conformer 2 and conformer 3).

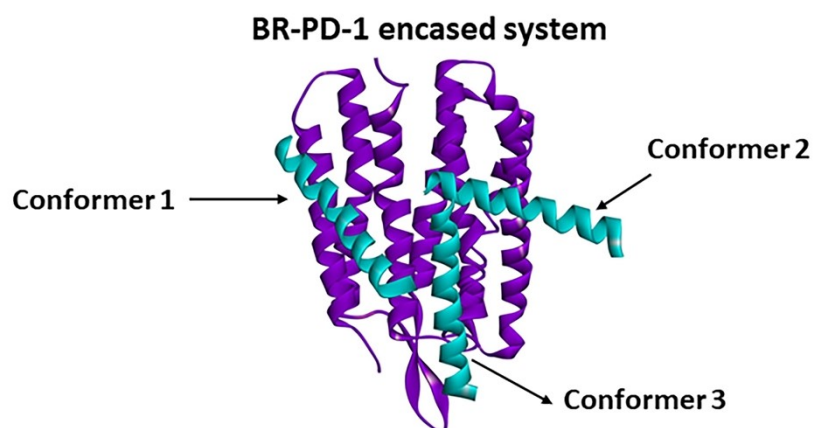

| Residues | Dihedral angles of Conformer 1 |        |          | Dihedral angles of Conformer 2 |        |          | Dihedral angles of Conformer 3 |        |          |
|----------|--------------------------------|--------|----------|--------------------------------|--------|----------|--------------------------------|--------|----------|
|          | $\phi$                         | $\psi$ | $\omega$ | $\phi$                         | $\psi$ | $\omega$ | $\phi$                         | $\psi$ | $\omega$ |
| GLU-1    | NA                             | -42.66 | NA       | NA                             | -24.81 | NA       | NA                             | -45.42 | NA       |
| GLU-2    | -53.28                         | -52.69 | -179.70  | -55.03                         | -42.48 | 157.91   | -70.95                         | -41.49 | -179.07  |
| LEU-3    | -64.51                         | -38.27 | 169.48   | -68.61                         | -44.28 | 178.77   | -55.68                         | -43.21 | -178.85  |
| LEU-4    | -65.17                         | -36.13 | 167.11   | -69.61                         | -30.03 | 178.94   | -61.68                         | -42.43 | 170.19   |
| LYS-5    | -65.24                         | -37.43 | 164.69   | -65.81                         | -36.96 | 164.61   | -58.94                         | -44.34 | 174.65   |
| GLN-6    | -65.71                         | -36.62 | 168.62   | -62.87                         | -45.68 | 172.46   | -63.15                         | -44.83 | 170.12   |
| ALA-7    | -60.94                         | -50.15 | 168.95   | -59.89                         | -42.89 | 175.57   | -61.39                         | -38.37 | 175.87   |
| LEU-8    | -62.83                         | -40.90 | 177.66   | -66.78                         | -39.63 | 178.27   | -69.70                         | -35.46 | 174.82   |
| GLN-9    | -72.06                         | -32.69 | 179.51   | -63.43                         | -48.23 | 174.51   | -68.37                         | -30.87 | 177.76   |
| GLN-10   | -75.31                         | -23.21 | 175.63   | -64.82                         | -33.56 | -178.07  | -71.28                         | -32.94 | 177.60   |
| ALA-11   | -64.11                         | -38.53 | 172.14   | -64.26                         | -38.54 | 169.78   | -60.51                         | -36.20 | 167.69   |
| GLN-12   | -66.64                         | -43.13 | 163.57   | -57.43                         | -39.00 | 171.92   | -65.75                         | -43.39 | 174.26   |
| GLN-13   | -68.47                         | -35.80 | 177.21   | -60.60                         | -42.73 | -179.80  | -68.71                         | -35.95 | -173.69  |
| LEU-14   | -62.81                         | -37.81 | 171.44   | -52.53                         | -38.52 | 178.37   | -63.27                         | -42.46 | 167.18   |
| LEU-15   | -65.39                         | -40.06 | 178.46   | -84.24                         | -20.52 | -171.03  | -71.59                         | -44.21 | -176.67  |
| GLN-16   | -62.07                         | -46.47 | 176.25   | -66.96                         | -48.79 | 165.04   | -64.33                         | -46.53 | 172.85   |
| GLN-17   | -51.19                         | -44.03 | 166.51   | -61.55                         | -46.80 | -171.44  | -62.32                         | -36.66 | -179.92  |
| ALA-18   | -65.39                         | -34.91 | 174.38   | -62.10                         | -41.50 | 179.43   | -63.53                         | -37.79 | 175.76   |
| GLN-19   | -65.45                         | -37.15 | 167.31   | -60.41                         | -49.46 | 174.25   | -71.54                         | -40.60 | 177.02   |
| GLU-20   | -63.95                         | -37.13 | 177.20   | -59.69                         | -40.11 | 170.79   | -63.95                         | -37.13 | 177.20   |
| LEU-21   | -62.89                         | -49.17 | 165.85   | -61.91                         | -44.70 | 169.42   | -62.89                         | -49.17 | 165.85   |
| ALA-22   | -54.73                         | -39.58 | -177.76  | -51.53                         | -39.93 | 174.09   | -70.09                         | -34.93 | 168.09   |
| LYS-23   | -69.02                         | -34.40 | 171.75   | -97.33                         | -37.01 | -177.46  | -97.33                         | -37.01 | -177.46  |
| LYS-24   | -78.55                         | NA     | -179.81  | -106.46                        | NA     | -168.54  | -91.38                         | NA     | -161.24  |

**Figure S25.** The dihedral angles of BR-PD-1 encased system. Note that we have tabulated the dihedral angles of PD-1 in three different conformations (conformer 1, conformer 2 and conformer 3).

**Table S1.** Dihedral angle values of Peptide 1.

| Residues   | Initial Dihedral angles for Peptide 1 |         |          | Dihedral angles for Peptide 1 after 200 ns MD simulation |         |          |
|------------|---------------------------------------|---------|----------|----------------------------------------------------------|---------|----------|
|            | $\phi$                                | $\psi$  | $\omega$ | $\phi$                                                   | $\psi$  | $\omega$ |
| OctylGly-1 | NA                                    | -179.97 | NA       | NA                                                       | 155.02  | NA       |
| Ser-2      | 179.96                                | 179.98  | -179.97  | -123.38                                                  | 144.24  | -179.01  |
| Sar-3      | -179.97                               | 179.99  | -179.94  | 36.55                                                    | -148.05 | 171.92   |
| Ser-4      | 180.00                                | -179.95 | 179.98   | -97.23                                                   | 137.62  | -175.76  |
| Sar-5      | 180.00                                | -179.98 | -179.93  | 104.29                                                   | 130.70  | -164.58  |
| Glu-6      | 179.96                                | 180.00  | 179.99   | -131.76                                                  | 62.08   | -174.95  |
| OctylGly-7 | 180.00                                | 179.96  | -179.98  | -157.80                                                  | 159.83  | 179.26   |
| Glu-8      | -179.98                               | NA      | 179.99   | -85.69                                                   | NA      | -174.91  |

**Table S2.** Dihedral angle values of Peptide 2.

| Residues        | Initial Dihedral angles for Peptide 2 |        |          | Dihedral angles for Peptide 2 after 200 ns MD simulation |        |          |
|-----------------|---------------------------------------|--------|----------|----------------------------------------------------------|--------|----------|
|                 | $\phi$                                | $\psi$ | $\omega$ | $\phi$                                                   | $\psi$ | $\omega$ |
| Pyrenebutyryl-1 | NA                                    | NA     | NA       | NA                                                       | NA     | NA       |
| Ser-2           | NA                                    | 176.47 | NA       | NA                                                       | 166.71 | NA       |
| Sar-3           | -152.27                               | 173.26 | 165.94   | -50.33                                                   | 152.98 | -177.43  |
| Ser-4           | -164.81                               | 171.66 | -178.30  | -147.38                                                  | 142.46 | 173.03   |
| Sar-5           | 165.95                                | 150.75 | 172.31   | 72.34                                                    | 148.54 | -164.66  |
| Glu-6           | -149.76                               | 173.25 | -172.10  | -75.61                                                   | 133.78 | 172.59   |
| OctylGly-7      | -164.21                               | 165.49 | -172.07  | -178.07                                                  | 149.38 | 172.06   |
| Glu-8           | -171.08                               | -      | 177.74   | -59.28                                                   | NA     | 176.23   |



**Table S3.** Dihedral angle values of Peptide 3.

| Residues                      | Initial Dihedral angles for Peptide 3 |         |          |  | Dihedral angles for Peptide 3 after 200 ns MD simulation |         |          |
|-------------------------------|---------------------------------------|---------|----------|--|----------------------------------------------------------|---------|----------|
|                               | $\phi$                                | $\psi$  | $\omega$ |  | $\phi$                                                   | $\psi$  | $\omega$ |
| D-alpha-tocopherol succinyl-2 | NA                                    | NA      | NA       |  | NA                                                       | NA      | NA       |
| Ser-2                         | NA                                    | 119.18  | NA       |  | NA                                                       | 150.07  | NA       |
| Sar-3                         | -122.25                               | -174.20 | 162.25   |  | -66.19                                                   | -166.38 | -171.80  |
| Ser-4                         | -170.36                               | 164.31  | 179.68   |  | -171.50                                                  | 113.25  | -157.75  |
| Sar-5                         | 154.27                                | 133.62  | 168.56   |  | -68.99                                                   | -28.30  | -176.71  |
| Glu-6                         | -150.31                               | -175.95 | -171.49  |  | -47.40                                                   | -48.84  | 169.30   |
| OctylGly-7                    | -179.79                               | 179.24  | 178.74   |  | -82.29                                                   | -31.28  | -173.88  |
| Glu-8                         | -161.37                               | NA      | -176.14  |  | -84.61                                                   | NA      | -178.97  |

**Table S4.** Dihedral angle values of Peptide 4.

| Residues   | Initial Dihedral angles for Peptide 4 |         |          | Dihedral angles for Peptide 4 after 200 ns MD simulation |        |          |
|------------|---------------------------------------|---------|----------|----------------------------------------------------------|--------|----------|
|            | $\phi$                                | $\psi$  | $\omega$ | $\phi$                                                   | $\psi$ | $\omega$ |
| OctylGly-1 | NA                                    | -179.97 | NA       | NA                                                       | 149.49 | NA       |
| Ser-2      | 179.96                                | 179.98  | -179.97  | -121.44                                                  | 124.23 | -176.10  |
| N-Me-Leu-3 | -179.97                               | 179.99  | -179.94  | -101.34                                                  | 128.01 | -163.24  |
| Ser-4      | -180.00                               | -179.95 | -179.94  | -116.34                                                  | 139.54 | 171.83   |
| N-Me-Leu-5 | 180.00                                | -179.98 | -179.93  | -86.73                                                   | 120.05 | 178.34   |
| Glu-6      | 179.96                                | 180.00  | 179.99   | -108.44                                                  | 164.30 | -171.74  |
| OctylGly-7 | 180.00                                | 179.96  | -179.98  | -58.12                                                   | 149.34 | 178.24   |
| Glu-8      | -179.98                               | NA      | 179.99   | -86.48                                                   | NA     | -174.97  |

**Table S5.** Dihedral angle values of Peptide 5.

| Residues           | Initial Peptide 5 Dihedral angles |         |          | Peptide 5 Dihedral angles after 300 ns MD Simulation |         |          |
|--------------------|-----------------------------------|---------|----------|------------------------------------------------------|---------|----------|
|                    | $\phi$                            | $\psi$  | $\omega$ | $\phi$                                               | $\psi$  | $\omega$ |
| <sup>D</sup> Ser-1 | 172.12                            | 128.28  | -179.30  | 86.68                                                | -154.23 | -172.48  |
| Sar-2              | -179.11                           | -102.62 | 174.00   | 83.94                                                | -72.16  | -179.93  |
| <sup>D</sup> Asp-3 | 109.83                            | 89.59   | 169.50   | 71.75                                                | 32.92   | -179.40  |
| OctylGly-4         | -91.46                            | -166.28 | 169.82   | -113.75                                              | 5.71    | -173.94  |
| <sup>D</sup> Ser-5 | 34.28                             | -176.04 | 149.77   | 146.23                                               | -136.13 | -167.59  |
| Sar-6              | -103.94                           | 174.24  | -174.36  | -89.61                                               | -165.57 | -178.97  |
| <sup>D</sup> Asp-7 | 57.16                             | 18.16   | 176.65   | 92.76                                                | -147.93 | -178.35  |
| Glu-8              | -76.44                            | -126.43 | -179.75  | -116.06                                              | 98.94   | -176.24  |

**Table S6.** Dihedral angle values of Peptide 6.

| Residues           | Initial Peptide 6 Dihedral angles |         |          | Peptide 6 Dihedral angles after 300 ns MD Simulation |         |          |
|--------------------|-----------------------------------|---------|----------|------------------------------------------------------|---------|----------|
|                    | $\phi$                            | $\psi$  | $\omega$ | $\phi$                                               | $\psi$  | $\omega$ |
| <sup>D</sup> Ser-1 | 172.12                            | 128.28  | -179.30  | 74.62                                                | 65.81   | -174.14  |
| N-Me-Leu-2         | -179.11                           | -102.62 | 174.00   | -118.52                                              | 107.62  | 169.76   |
| <sup>D</sup> Asp-3 | 109.83                            | 89.59   | 169.50   | 62.78                                                | -143.96 | 177.02   |
| OctylGly-4         | -91.46                            | -166.28 | 169.82   | -133.03                                              | 129.75  | -173.41  |
| <sup>D</sup> Ser-5 | 34.28                             | -176.04 | 149.77   | 160.72                                               | -124.12 | -177.42  |
| N-Me-Leu-6         | -103.94                           | 174.24  | -174.36  | -103.02                                              | 143.01  | -177.36  |
| <sup>D</sup> Asp-7 | 57.16                             | 18.16   | 176.65   | 73.74                                                | -153.78 | 173.54   |
| Glu-8              | -76.44                            | -126.43 | -179.75  | -123.61                                              | 172.89  | -176.31  |

**Table S7.** Dihedral angle values of Peptide BP-1.

| Residues   | Initial BP-1 Dihedral angles |        |          | BP-1 Dihedral angles after 200 ns MD Simulation |        |          |
|------------|------------------------------|--------|----------|-------------------------------------------------|--------|----------|
|            | $\phi$                       | $\psi$ | $\omega$ | $\phi$                                          | $\psi$ | $\omega$ |
| OctylGly-1 | NA                           | 120.06 | NA       | NA                                              | 143.08 | NA       |
| Ser-2      | -120.06                      | 119.97 | -179.98  | -102.15                                         | 110.85 | -170.09  |
| Leu-3      | -119.96                      | 119.97 | -179.99  | -111.58                                         | 155.90 | -177.35  |
| Ser-4      | -119.95                      | 120.00 | -180.00  | -89.19                                          | 139.73 | -174.47  |
| N-Me-Leu-5 | -120.05                      | 120.05 | -180.00  | -98.95                                          | 85.00  | -163.72  |
| Asp-6      | -120.00                      | 120.03 | -179.97  | -68.75                                          | 133.45 | -174.62  |
| OctylGly-7 | -120.01                      | 119.94 | -179.95  | -64.02                                          | 131.41 | -170.98  |
| Asp-8      | -119.95                      | NA     | -179.96  | -64.66                                          | NA     | 170.47   |

**Table S8.** Dihedral angle values of Peptide LPD-12.

| Residues | Initial LPD-12 Dihedral angles |        |          | LPD-12 Dihedral angles after 200 ns MD Simulation |        |          |
|----------|--------------------------------|--------|----------|---------------------------------------------------|--------|----------|
|          | $\phi$                         | $\psi$ | $\omega$ | $\phi$                                            | $\psi$ | $\omega$ |
| Ala-1    | NA                             | -43.28 | NA       | NA                                                | -52.41 | NA       |
| Orl-2    | -63.83                         | -45.90 | -175.86  | -70.16                                            | -24.72 | 175.17   |
| Ala-3    | -63.86                         | -43.40 | 177.92   | -60.11                                            | -47.84 | 158.08   |
| Glu-4    | -62.10                         | -42.39 | 179.73   | -58.37                                            | -39.77 | 171.79   |
| Ala-5    | -64.22                         | -40.36 | 178.89   | -65.22                                            | -30.21 | -179.93  |
| Ala-6    | -64.22                         | -39.44 | 177.80   | -74.19                                            | -37.19 | 179.76   |
| Glu-7    | -62.65                         | -46.78 | 178.97   | -67.87                                            | -43.94 | 169.88   |
| Lys-8    | -61.05                         | -44.87 | -179.10  | -58.20                                            | -45.56 | 176.85   |
| Ala-9    | -65.20                         | -42.93 | -179.52  | -50.63                                            | -48.56 | 176.62   |
| Ala-10   | -64.66                         | -40.02 | 179.06   | -69.52                                            | -47.37 | 178.93   |
| Lys-11   | -62.87                         | -39.82 | 176.56   | -57.07                                            | -41.22 | 159.99   |
| Tyr-12   | -60.89                         | -45.01 | 177.66   | -60.17                                            | -49.29 | 179.40   |
| Ala-13   | -60.71                         | -41.58 | 177.45   | -62.35                                            | -36.77 | 170.56   |
| Ala-14   | -60.59                         | -44.69 | 177.58   | -62.08                                            | -47.56 | 168.78   |
| Glu-15   | -62.53                         | -40.44 | 177.06   | -64.38                                            | -45.34 | -179.77  |
| Ala-16   | -64.17                         | -41.30 | 177.23   | -59.70                                            | -41.21 | 176.57   |
| Ala-17   | -64.55                         | -42.01 | 177.41   | -62.45                                            | -45.44 | 172.80   |
| Glu-18   | -58.20                         | -45.98 | 176.72   | -53.55                                            | -43.07 | 169.11   |
| Lys-19   | -60.12                         | -40.04 | 179.81   | -61.87                                            | -40.46 | 176.92   |
| Ala-20   | -65.52                         | -41.79 | 178.22   | -76.78                                            | -41.35 | 170.11   |
| Ala-21   | -59.40                         | -45.24 | 179.78   | -56.16                                            | -36.83 | 171.29   |
| Lys-22   | -65.92                         | -40.18 | 179.82   | -70.40                                            | -26.03 | 175.20   |
| Ala-23   | -65.20                         | -41.85 | -178.98  | -79.13                                            | -19.0  | 174.03   |
| Orl-24   | -63.66                         | -30.17 | -179.04  | -75.49                                            | -36.18 | 176.61   |
| Ala-25   | -72.48                         | NA     | 179.92   | -75.34                                            | NA     | 166.86   |

**Table S9.** Dihedral angle values of Peptide PD-1.

| Residues | Initial PD-1 Dihedral angles |         |          | PD-1 Dihedral angles after 200 ns MD Simulation |        |          |
|----------|------------------------------|---------|----------|-------------------------------------------------|--------|----------|
|          | $\phi$                       | $\psi$  | $\omega$ | $\phi$                                          | $\psi$ | $\omega$ |
| Glu-1    | NA                           | -47.06  | NA       | NA                                              | -38.41 | 173.22   |
| Glu-2    | -56.97                       | -46.97  | -180.00  | -73.86                                          | -27.24 | 169.02   |
| Leu-3    | -57.03                       | -46.94  | -179.99  | -66.10                                          | -38.95 | 169.02   |
| Leu-4    | -57.04                       | -46.99  | -179.98  | -57.31                                          | -39.04 | 169.71   |
| Lys-5    | -57.04                       | -46.98  | -179.95  | -60.69                                          | -45.81 | 167.37   |
| Gln-6    | -57.03                       | -46.99  | -179.96  | -67.09                                          | -36.07 | -178.55  |
| Ala-7    | -56.94                       | -47.06  | 179.99   | -57.80                                          | -46.13 | 169.64   |
| Leu-8    | -56.99                       | -46.97  | -179.97  | -61.39                                          | -47.63 | 176.68   |
| Gln-9    | -57.05                       | -46.96  | -179.96  | -64.06                                          | -42.74 | -179.76  |
| Gln-10   | -57.02                       | -46.99  | -179.95  | -61.43                                          | -36.53 | 175.59   |
| Ala-11   | -57.01                       | -47.04  | -179.97  | -60.45                                          | -44.65 | 168.63   |
| Gln-12   | -56.96                       | -46.99  | -180.00  | -64.20                                          | -41.43 | 173.73   |
| Gln-13   | -56.98                       | -47.01  | -179.99  | -57.20                                          | -49.76 | 167.32   |
| Leu-14   | -57.01                       | -47.04  | -179.99  | -60.42                                          | -44.55 | 175.33   |
| Leu-15   | -56.97                       | -46.98  | -179.98  | -64.50                                          | -42.55 | 171.35   |
| Gln-16   | -57.04                       | -47.00  | -179.95  | -50.70                                          | -46.87 | 163.69   |
| Gln-17   | -56.99                       | -47.00  | -179.96  | -66.21                                          | -39.55 | -176.93  |
| Ala-18   | -56.98                       | -46.94  | 179.98   | -58.20                                          | -43.62 | 175.84   |
| Gln-19   | -57.06                       | -46.99  | -179.96  | -65.29                                          | -39.80 | 169.39   |
| Glu-20   | -57.04                       | -46.94  | 179.98   | -58.48                                          | -50.85 | 168.91   |
| Leu-21   | -57.03                       | -47.00  | -179.98  | -54.06                                          | -42.64 | 175.62   |
| Ala-22   | -57.01                       | -47.00  | -179.98  | -63.11                                          | -39.15 | 171.70   |
| Lys-23   | -56.97                       | -119.99 | -179.97  | -58.99                                          | -44.79 | 170.12   |
| Lys-24   | -120.05                      | NA      | -179.96  | -95.69                                          | NA     | -169.01  |

**Table S10.** Dihedral angle values of detergent-like Peptide A<sub>6</sub>D.

| Residues | Initial A <sub>6</sub> D Dihedral angles |        |          | A <sub>6</sub> D Dihedral angles after 200 ns MD Simulation |         |          |
|----------|------------------------------------------|--------|----------|-------------------------------------------------------------|---------|----------|
|          | $\phi$                                   | $\psi$ | $\omega$ | $\phi$                                                      | $\psi$  | $\omega$ |
| Ala-1    | NA                                       | 51.67  | NA       | NA                                                          | -179.97 | NA       |
| Ala-2    | -107.47                                  | -12.74 | -177.37  | -179.96                                                     | 179.99  | -179.98  |
| Ala-3    | -79.86                                   | 177.63 | 171.54   | -179.98                                                     | 180.00  | -179.94  |
| Ala-4    | -78.63                                   | 149.59 | -174.91  | -179.99                                                     | 179.95  | 179.98   |
| Ala-5    | -60.55                                   | 141.99 | -173.54  | -180.00                                                     | 179.98  | -179.93  |
| Ala-6    | -79.89                                   | 137.22 | 175.11   | -179.96                                                     | 180.00  | 179.99   |
| Asp-7    | -62.58                                   | NA     | -177.43  | -179.99                                                     | NA      | -179.97  |



**Table S11.** Dihedral angle values of detergent-like Peptide A<sub>6</sub>K.

| Residues | Initial A <sub>6</sub> K Dihedral angles |         |          | A <sub>6</sub> K Dihedral angles after 200 ns MD Simulation |        |          |
|----------|------------------------------------------|---------|----------|-------------------------------------------------------------|--------|----------|
|          | $\phi$                                   | $\psi$  | $\omega$ | $\phi$                                                      | $\psi$ | $\omega$ |
| Ala-1    | NA                                       | -179.97 | NA       | NA                                                          | 128.41 | NA       |
| Ala-2    | -179.96                                  | 179.99  | -179.98  | -111.30                                                     | -9.85  | 179.89   |
| Ala-3    | -179.98                                  | 180.00  | -179.94  | -116.78                                                     | 152.26 | 170.68   |
| Ala-4    | -179.99                                  | 179.95  | 179.98   | -96.12                                                      | 127.84 | 176.81   |
| Ala-5    | -180.00                                  | 179.98  | -179.93  | -54.79                                                      | 152.60 | 166.49   |
| Ala-6    | -179.96                                  | 180.00  | 179.99   | -51.20                                                      | 129.45 | -177.37  |
| Lys-7    | -179.99                                  | NA      | -179.97  | -79.92                                                      | NA     | -178.78  |

**Table S12.** The half-life period of BR in the presence of peptides 1-6 and OG.

| <b>Detergent used for stabilising BR</b> | <b>Time taken for decaying (100% to 50%) (day)</b> |
|------------------------------------------|----------------------------------------------------|
| Peptide 1                                | $17.18 \pm 0.14 \approx 17$                        |
| Peptide 2                                | $19.22 \pm 0.004 \approx 19$                       |
| Peptide 3                                | $1.97 \pm 0.039 \approx 2$                         |
| Peptide 4                                | $5.60 \pm 0.02 \approx 5.6$                        |
| Peptide 5                                | $0.88 \pm 0.0001 \approx 1$                        |
| Peptide 6                                | $24.87 \pm 0.053 \approx 25$                       |
| OG                                       | $0.57 \pm 0.001 \approx 0.6$                       |

**Table S13.** Important parameters of detergent encased BR systems obtained from MD simulations.

| <b>BR-detergent Complexes</b> | <b>C<sup>α</sup>-atom RMSD of BR (nm)</b> | <b>% Covered Area</b> | <b>van der Waals energy (kJ/mol)</b> | <b>Electrostatic energy (kJ/mol)</b> | <b>Total energy<sup>a</sup> (kJ/mol)</b> |
|-------------------------------|-------------------------------------------|-----------------------|--------------------------------------|--------------------------------------|------------------------------------------|
| BR-Peptide 1                  | 0.32±0.03                                 | 65.3±4.4              | -1382.5±113.1                        | -3044.6±599.4                        | -4427.1±576.0                            |
| BR-Peptide 2                  | 0.29±0.02                                 | 71.8±2.6              | -1708.0±84.6                         | -1793.6±428.3                        | -3501.6±414.4                            |
| BR-Peptide 3                  | 0.25±0.03                                 | 75.7±6.2              | -1678.7±164.7                        | -2337.4±482.6                        | -4016.1±491.4                            |
| BR-Peptide 4                  | 0.24±0.02                                 | 84.9±3.9              | -1846.7±117.5                        | -2626.6±499.5                        | -4473.3±571.7                            |
| BR-Peptide 5                  | 0.19±0.01                                 | 57.8±2.6              | -1171.8±242.6                        | -928.7±564.6                         | -2100.5±710.1                            |
| BR-Peptide 6                  | 0.26±0.02                                 | 89.9±1.9              | -2057.3±67.2                         | -2913.7±518.0                        | -4971.0±506.3                            |
| BR-BP-1                       | 0.21±0.02                                 | 70.8±3.1              | -1384.5±215.3                        | -1710.0±643.9                        | -3094.5±825.6                            |
| BR-LPD-12                     | 0.26±0.02                                 | 86.4±3.4              | -1798.4±76.3                         | -2073.6±508.5                        | -3872.0±537.4                            |
| BR-PD-1                       | 0.25±0.01                                 | 86.1±2.7              | -1711.6±58.0                         | -2364.7±507.4                        | -4076.3±520.1                            |
| BR-A <sub>6</sub> D           | 0.20±0.03                                 | 43.3±5.9              | -571.6±210.5                         | -1487.9±1544.5                       | -2059.5±1557.0                           |
| BR-A <sub>6</sub> K           | 0.23±0.02                                 | 53.9±4.6              | -1024.0±203.3                        | -1229.7±425.1                        | -2253.7±546.2                            |
| BR-OG                         | 0.34±0.03                                 | 89.9±4.5              | -2215.6±115.1                        | -473.3±122.0                         | -2688.9±190.5                            |

<sup>a</sup>Total energy= van der Waals energy+ Electrostatic energy

**Table S14.** Molecular interactions in Peptide 1 encased BR system.

| <b>Peptide1</b> | <b>BR</b>   | <b>Bond-length (Å)</b> | <b>Types of interactions</b>    |
|-----------------|-------------|------------------------|---------------------------------|
| GLU6:OE2        | GLY6:H3     | 1.63                   | Hydrogen Bond;<br>Electrostatic |
| GUN8:OE2        | ARG7:NH1    | 4.25                   | Electrostatic                   |
| GLU6:OE1        | LYS30:NZ    | 4.56                   | Electrostatic                   |
| GUN8:HNL2       | GLY33:O     | 2.82                   | Hydrogen Bond                   |
| GUN8:OE1        | ARG7:HH11   | 1.80                   | Hydrogen Bond                   |
| GUN8:OK         | TRP10:HE1   | 1.76                   | Hydrogen Bond                   |
| GUN8:OE1        | SER169:HG1  | 1.63                   | Hydrogen Bond                   |
| GLK7:O          | ASN176:HD21 | 1.81                   | Hydrogen Bond                   |
| GUN8:OK         | ASN176:HD22 | 2.32                   | Hydrogen Bond                   |

**Table S15.** Molecular interactions in Peptide 2 encased BR system.

| Peptide  | BR                | Bond length (Å) | Type of interactions        |
|----------|-------------------|-----------------|-----------------------------|
| GUN8:OE1 | LYS172:HZ3        | 1.56            | Hydrogen Bond;Electrostatic |
| GLU6:OE2 | LYS40:NZ          | 5.13            | Electrostatic               |
| GLU6:OE2 | ARG225:NH1        | 3.64            | Electrostatic               |
| GLU6:OE1 | ARG225:NH2        | 5.38            | Electrostatic               |
| SER2:HG  | GLY73:O           | 1.93            | Hydrogen Bond               |
| GUN8:HN  | TYR64:OH          | 2.51            | Hydrogen Bond               |
| GLU6:O   | TRP12:HE1         | 1.97            | Hydrogen Bond               |
| GLK7:O   | LYS40:HZ1         | 2.52            | Hydrogen Bond               |
| GLK7:O   | LYS40:HZ2         | 2.31            | Hydrogen Bond               |
| SER2:O   | GLY73:HN          | 1.91            | Hydrogen Bond               |
| SER2:O   | GLN75:HE21        | 2.97            | Hydrogen Bond               |
| SAR5:O   | TYR133:HH         | 1.88            | Hydrogen Bond               |
| SER2:OG  | TYR150:HH         | 2.05            | Hydrogen Bond               |
| GUN8:OK  | ASN202:HD21       | 2.19            | Hydrogen Bond               |
| GLU6:O   | ASN202:HD22       | 2.54            | Hydrogen Bond               |
| PYR1     | ARG175:NH2        | 4.44            | Electrostatic               |
| PYR1     | ARG175:NH2        | 4.45            | Electrostatic               |
| PYR1     | TYR64:HB2         | 2.91            | Hydrophobic                 |
| PYR1     | TYR64             | 5.90            | Hydrophobic                 |
| PYR1     | TYR64             | 4.83            | Hydrophobic                 |
| PYR1     | PHE88             | 5.00            | Hydrophobic                 |
| PYR1     | TYR147            | 4.81            | Hydrophobic                 |
| PYR1     | TRP80             | 5.52            | Hydrophobic                 |
| PYR1     | PHE153            | 5.00            | Hydrophobic                 |
| PYR1     | PHE153            | 4.96            | Hydrophobic                 |
| PYR1     | PHE153            | 5.19            | Hydrophobic                 |
| PYR1     | GLY72:C,O;GLY73:N | 4.74            | Hydrophobic                 |
| PYR1     | GLY72:C,O;GLY73:N | 4.19            | Hydrophobic                 |
| PYR1     | GLY72:C,O;GLY73:N | 3.80            | Hydrophobic                 |
| PYR1     | GLY72:C,O;GLY73:N | 5.04            | Hydrophobic                 |
| PYR1     | ILE140            | 5.19            | Hydrophobic                 |
| PYR1     | PRO70             | 5.07            | Hydrophobic                 |
| PYR1     | MET32             | 4.96            | Hydrophobic                 |
| PYR1     | ALA139            | 4.42            | Hydrophobic                 |
| PYR1     | VAL199            | 4.78            | Hydrophobic                 |
| PYR1     | VAL199            | 5.40            | Hydrophobic                 |
| PYR1     | ILE203            | 4.49            | Hydrophobic                 |

|      |        |      |             |
|------|--------|------|-------------|
| PYR1 | ILE203 | 4.89 | Hydrophobic |
| PYR1 | ALA139 | 5.29 | Hydrophobic |
| PYR1 | PRO70  | 5.14 | Hydrophobic |
| PYR1 | LEU48  | 5.16 | Hydrophobic |
| PYR1 | LEU48  | 5.20 | Hydrophobic |
| PYR1 | ALA51  | 5.30 | Hydrophobic |
| PYR1 | ILE52  | 4.82 | Hydrophobic |
| PYR1 | ILE52  | 5.45 | Hydrophobic |
| PYR1 | ILE52  | 4.26 | Hydrophobic |
| PYR1 | ALA114 | 5.43 | Hydrophobic |
| PYR1 | LEU28  | 5.26 | Hydrophobic |
| PYR1 | ALA44  | 4.83 | Hydrophobic |
| PYR1 | ALA51  | 4.86 | Hydrophobic |
| PYR1 | ALA84  | 5.15 | Hydrophobic |
| PYR1 | LEU109 | 5.21 | Hydrophobic |
| PYR1 | ALA110 | 4.87 | Hydrophobic |
| PYR1 | ALA110 | 4.87 | Hydrophobic |
| PYR1 | ALA110 | 3.63 | Hydrophobic |
| PYR1 | VAL177 | 5.18 | Hydrophobic |
| PYR1 | VAL177 | 4.98 | Hydrophobic |
| PYR1 | VAL179 | 5.34 | Hydrophobic |

**Table S16.** Molecular interactions in Peptide 3 encased BR system.

| Peptide 3 | BR         | Bond length (Å) | Type of interaction         |
|-----------|------------|-----------------|-----------------------------|
| GUN8:OE2  | LYS41:HZ2  | 1.72            | Hydrogen Bond;Electrostatic |
| SER2:HG   | ALA110:O   | 1.90            | Hydrogen Bond               |
| GUN8:HN   | THR107:OG1 | 2.10            | Hydrogen Bond               |
| GUN8:HNL2 | LEU28:O    | 2.72            | Hydrogen Bond               |
| GLK7:O    | GLY6:HN1   | 2.57            | Hydrogen Bond               |
| GLK7:O    | GLY6:HN3   | 2.70            | Hydrogen Bond               |
| GUN8:OK   | ARG7:HN    | 2.52            | Hydrogen Bond               |
| GUN8:OE1  | TYR26:HH   | 1.79            | Hydrogen Bond               |
| TOC1      | TYR26      | 5.73            | Hydrophobic                 |
| TOC1      | LEU123     | 5.38            | Hydrophobic                 |
| TOC1:C16  | LEU127     | 4.95            | Hydrophobic                 |
| TOC1:C27  | ALA84      | 4.46            | Hydrophobic                 |
| TOC1:C27  | LEU87      | 4.10            | Hydrophobic                 |
| TOC1:C27  | LEU123     | 4.92            | Hydrophobic                 |
| TOC1      | PRO70      | 4.66            | Hydrophobic                 |
| TOC1      | LYS129     | 5.48            | Hydrophobic                 |
| TOC1:C17  | VAL130     | 4.74            | Hydrophobic                 |
| TOC1:C16  | PRO70      | 4.30            | Hydrophobic                 |
| TOC1:C16  | VAL130     | 4.47            | Hydrophobic                 |
| TOC1:C28  | VAL130     | 5.10            | Hydrophobic                 |
| TOC1      | ILE11      | 5.09            | Hydrophobic                 |
| TOC1      | LEU15      | 4.76            | Hydrophobic                 |
| TOC1:C16  | ALA14      | 4.07            | Hydrophobic                 |
| TOC1:C15  | LEU15      | 4.85            | Hydrophobic                 |
| TOC1:C15  | ALA18      | 3.96            | Hydrophobic                 |
| TOC1:C27  | LEU15      | 4.89            | Hydrophobic                 |
| TOC1:C28  | ILE11      | 5.11            | Hydrophobic                 |
| TOC1:C2   | LEU22      | 4.91            | Hydrophobic                 |
| TOC1      | PRO186     | 4.83            | Hydrophobic                 |
| TOC1      | LEU146     | 4.58            | Hydrophobic                 |
| TOC1      | PRO186     | 5.42            | Hydrophobic                 |
| TOC1:C17  | PRO186     | 4.47            | Hydrophobic                 |
| TOC1:C17  | VAL187     | 4.54            | Hydrophobic                 |
| TOC1:C16  | LEU146     | 4.56            | Hydrophobic                 |
| TOC1:C16  | PRO186     | 4.34            | Hydrophobic                 |
| TOC1:C15  | ALA143     | 4.34            | Hydrophobic                 |

|          |        |      |             |
|----------|--------|------|-------------|
| TOC1:C15 | LEU146 | 5.47 | Hydrophobic |
| TOC1:C28 | PRO186 | 5.24 | Hydrophobic |
| TOC1:C28 | LEU190 | 4.41 | Hydrophobic |
| TOC1:C29 | LEU190 | 5.02 | Hydrophobic |
| TOC1     | ILE140 | 5.01 | Hydrophobic |
| TOC1:C28 | ILE117 | 4.92 | Hydrophobic |
| TOC1:C28 | ILE140 | 4.87 | Hydrophobic |
| TOC1:C29 | ILE117 | 5.10 | Hydrophobic |
| TOC1:C16 | ALA18  | 4.18 | Hydrophobic |
| TOC1:C16 | LEU22  | 4.63 | Hydrophobic |
| TOC1:C15 | ALA14  | 3.92 | Hydrophobic |
| TOC1:C15 | ALA18  | 4.24 | Hydrophobic |
| TOC1:C28 | LEU58  | 5.13 | Hydrophobic |
| TOC1     | VAL217 | 5.12 | Hydrophobic |
| TOC1     | LEU221 | 4.88 | Hydrophobic |
| TOC1     | VAL213 | 5.21 | Hydrophobic |
| TOC1     | VAL217 | 5.49 | Hydrophobic |
| TOC1:C17 | VAL217 | 4.98 | Hydrophobic |
| TOC1:C17 | LEU221 | 4.26 | Hydrophobic |
| TOC1:C16 | VAL217 | 4.34 | Hydrophobic |
| TOC1:C29 | LEU22  | 4.36 | Hydrophobic |
| TOC1     | LEU146 | 5.26 | Hydrophobic |
| TOC1:C17 | LEU146 | 5.48 | Hydrophobic |
| TOC1:C16 | LEU146 | 4.65 | Hydrophobic |
| TOC1:C15 | ALA143 | 4.14 | Hydrophobic |
| TOC1:C15 | ALA144 | 4.34 | Hydrophobic |
| TOC1:C2  | ALA114 | 4.40 | Hydrophobic |
| TOC1:C2  | LEU25  | 4.78 | Hydrophobic |
| TOC1     | LEU15  | 4.68 | Hydrophobic |
| TOC1     | ALA18  | 4.54 | Hydrophobic |
| TOC1     | ALA18  | 4.73 | Hydrophobic |
| TOC1     | LEU123 | 5.49 | Hydrophobic |
| TOC1     | ALA143 | 4.97 | Hydrophobic |
| TOC1     | LEU190 | 5.04 | Hydrophobic |
| TOC1     | LEU15  | 5.09 | Hydrophobic |
| TOC1     | LEU190 | 4.60 | Hydrophobic |
| TOC1:C28 | TRP12  | 4.81 | Hydrophobic |
| TOC1:C29 | TRP12  | 4.87 | Hydrophobic |
| TOC1     | TYR26  | 4.29 | Hydrophobic |
| TOC1:C27 | TYR26  | 5.07 | Hydrophobic |
| TOC1:C17 | PHE27  | 4.47 | Hydrophobic |
| TOC1:C17 | PHE54  | 4.61 | Hydrophobic |
| TOC1:C28 | PHE54  | 4.81 | Hydrophobic |
| TOC1     | TRP80  | 5.13 | Hydrophobic |
| TOC1     | TRP80  | 5.32 | Hydrophobic |
| TOC1:C2  | TRP80  | 5.21 | Hydrophobic |



|          |        |      |             |
|----------|--------|------|-------------|
| TOC1:C28 | TYR131 | 5.18 | Hydrophobic |
| TOC1:C29 | TYR131 | 4.76 | Hydrophobic |
| TOC1:C29 | PHE135 | 5.22 | Hydrophobic |
| TOC1     | TRP137 | 5.10 | Hydrophobic |
| TOC1:C17 | TRP137 | 5.32 | Hydrophobic |
| TOC1:C28 | TRP138 | 5.11 | Hydrophobic |
| TOC1     | TYR147 | 5.35 | Hydrophobic |
| TOC1:C29 | TRP189 | 5.48 | Hydrophobic |

**Table S17.** Molecular interactions in Peptide 4 encased BR system.

| <b>Peptide</b> | <b>BR</b>   | <b>Bond length (Å)</b> | <b>Type of interaction</b>  |
|----------------|-------------|------------------------|-----------------------------|
| GLU6:OE1       | LYS30:HZ1   | 1.72                   | Hydrogen Bond;Electrostatic |
| GUN8:OE2       | GLY6:N      | 3.55                   | Electrostatic               |
| GUN8:HNL1      | TYR147:OH   | 2.92                   | Hydrogen Bond               |
| SER2:HN        | LEU224:O    | 3.04                   | Hydrogen Bond               |
| GUN8:OE1       | GLY6:HT2    | 1.84                   | Hydrogen Bond               |
| GLK7:O         | TRP10:HE1   | 1.95                   | Hydrogen Bond               |
| GLU6:OE2       | TYR26:HH    | 1.58                   | Hydrogen Bond               |
| GLK1:O         | LYS30:HZ2   | 1.86                   | Hydrogen Bond               |
| ACE0:O         | GLN105:HE21 | 2.97                   | Hydrogen Bond               |
| ACE0:O         | GLN105:HE22 | 3.06                   | Hydrogen Bond               |
| GLK7:O         | TYR131:HH   | 1.92                   | Hydrogen Bond               |
| GLK7:O         | TYR147:HH   | 2.80                   | Hydrogen Bond               |
| GLK7:O         | ARG225:HE   | 3.07                   | Hydrogen Bond               |
| SER4:OG        | ARG225:HH11 | 2.87                   | Hydrogen Bond               |
| GLU6:O         | ARG225:HH11 | 1.90                   | Hydrogen Bond               |
| GUN8:OK        | ARG225:HH12 | 3.04                   | Hydrogen Bond               |
| GLK7:O         | ARG225:HH21 | 2.40                   | Hydrogen Bond               |

**Table S18.** Molecular interactions in Peptide 5 encased BR system.

| <b>Peptide</b> | <b>BR</b>  | <b>Bond Length (Å)</b> | <b>Type of interaction</b>   |
|----------------|------------|------------------------|------------------------------|
| DAS7:OD1       | LYS129:HZ1 | 1.75                   | Hydrogen Bond; Electrostatic |
| DAS3:OD2       | LYS172:HZ2 | 1.77                   | Hydrogen Bond; Electrostatic |
| DAS3:OD2       | GLY6:N     | 4.76                   | Electrostatic                |
| DAS7:OD2       | LYS129:NZ  | 2.84                   | Electrostatic                |
| DAS3:OD1       | LYS172:NZ  | 4.74                   | Electrostatic                |
| GON8:HI        | SER59:OG   | 1.87                   | Hydrogen Bond                |
| GON8:HI        | LEU127:O   | 1.88                   | Hydrogen Bond                |
| GON8:HX2       | THR55:OG1  | 1.96                   | Hydrogen Bond                |
| GON8:HX1       | SER214:O   | 2.58                   | Hydrogen Bond                |
| DAS3:O         | TRP10:HE1  | 1.89                   | Hydrogen Bond                |
| DAS7:O         | THR67:HG1  | 2.90                   | Hydrogen Bond                |
| GON8:O         | TRP80:HE1  | 3.00                   | Hydrogen Bond                |
| GON8:OL        | LYS129:HN  | 2.08                   | Hydrogen Bond                |

**Table S19.** Molecular interactions in Peptide 6 encased BR system.

| <b>Peptide</b>  | <b>BR</b>   | <b>Bond Length (Å)</b> | <b>Type of interaction</b>      |
|-----------------|-------------|------------------------|---------------------------------|
| DAS3:OD1        | LYS30:HZ3   | 1.59                   | Hydrogen Bond;<br>Electrostatic |
| DAS3:OD2        | LYS40:HZ3   | 1.58                   | Hydrogen Bond;<br>Electrostatic |
| DAS3:OD2        | GLY6:N      | 5.52                   | Electrostatic                   |
| DAS3:OD2        | LYS30:NZ    | 3.27                   | Electrostatic                   |
| DAS3:OD1        | LYS40:NZ    | 4.47                   | Electrostatic                   |
| DAS3:OD2        | ARG225:NH2  | 5.03                   | Electrostatic                   |
| GON8:HI         | ASN176:OD1  | 1.78                   | Hydrogen Bond                   |
| DSN5:HN         | ILE198:O    | 1.91                   | Hydrogen Bond                   |
| GON8:HX2        | SER158:OG   | 2.00                   | Hydrogen Bond                   |
| GON8:HX2        | SER158:O    | 3.06                   | Hydrogen Bond                   |
| GON8:HX1        | SER162:OG   | 2.50                   | Hydrogen Bond                   |
| DAS7:O          | GLY6:HN1    | 1.99                   | Hydrogen Bond                   |
| LEN6:O          | TRP10:HE1   | 2.10                   | Hydrogen Bond                   |
| DAS3:OD2        | TYR26:HH    | 1.60                   | Hydrogen Bond                   |
| GON8:OL         | LYS159:HZ1  | 2.86                   | Hydrogen Bond                   |
| DAS3:OD1        | ASN176:HD22 | 1.98                   | Hydrogen Bond                   |
| GON8:OE2        | ARG225:HH12 | 1.85                   | Hydrogen Bond                   |
| LEN2:O          | ARG225:HH22 | 2.09                   | Hydrogen Bond                   |
| DSN1:C,O;LEN2:N | TRP12       | 4.84                   | Hydrophobic                     |

**Table S20.** Molecular interactions in OG encased BR system.

| <b>OG</b>  | <b>BR</b>   | <b>Bond Length (Å)</b> | <b>Type of interaction</b> |
|------------|-------------|------------------------|----------------------------|
| LIG239:O5  | THR67:HG1   | 1.91                   | Hydrogen Bond              |
| LIG269:O6  | TRP137:HE1  | 2.83                   | Hydrogen Bond              |
| LIG257:O5  | ARG225:HH21 | 2.99                   | Hydrogen Bond              |
| LIG277:O6  | ARG227:HE   | 1.93                   | Hydrogen Bond              |
| LIG277:O6  | ARG227:HH21 | 2.95                   | Hydrogen Bond              |
| LIG232:H23 | SER183:OG   | 2.94                   | Hydrogen Bond              |
| LIG238:H23 | GLY21:O     | 1.78                   | Hydrogen Bond              |
| LIG239:H14 | MET68:O     | 2.85                   | Hydrogen Bond              |
| LIG241:H23 | SER214:OG   | 1.95                   | Hydrogen Bond              |
| LIG245:H23 | THR55:OG1   | 1.91                   | Hydrogen Bond              |
| LIG251:H18 | TYR131:OH   | 2.10                   | Hydrogen Bond              |
| LIG257:H18 | TYR26:OH    | 2.47                   | Hydrogen Bond              |
| LIG272:H15 | LEU28:O     | 2.78                   | Hydrogen Bond              |
| LIG272:H23 | PHE27:O     | 2.98                   | Hydrogen Bond              |
| LIG272:H23 | THR47:OG1   | 2.04                   | Hydrogen Bond              |
| LIG277:H18 | ASP96:OD2   | 2.30                   | Hydrogen Bond              |
| LIG277:H23 | SER226:OG   | 1.90                   | Hydrogen Bond              |
| LIG278:H18 | SER59:OG    | 1.74                   | Hydrogen Bond              |
| LIG300:H23 | SER169:O    | 2.30                   | Hydrogen Bond              |
| LIG261:C13 | ALA44       | 4.08                   | Hydrophobic                |
| LIG272     | ALA44       | 4.12                   | Hydrophobic                |
| LIG238:C13 | ALA51       | 4.42                   | Hydrophobic                |
| LIG260     | ALA51       | 4.71                   | Hydrophobic                |
| LIG282:C13 | ALA81       | 4.27                   | Hydrophobic                |
| LIG259     | ALA84       | 4.65                   | Hydrophobic                |
| LIG316     | ALA114      | 4.79                   | Hydrophobic                |
| LIG269     | VAL136      | 4.50                   | Hydrophobic                |
| LIG269:C13 | ALA139      | 4.11                   | Hydrophobic                |
| LIG312     | ALA139      | 4.47                   | Hydrophobic                |
| LIG295:C13 | ALA143      | 4.03                   | Hydrophobic                |
| LIG315:C13 | ALA143      | 4.18                   | Hydrophobic                |
| LIG316:C13 | ALA143      | 4.38                   | Hydrophobic                |
| LIG281     | VAL177      | 4.86                   | Hydrophobic                |
| LIG281     | VAL180      | 4.49                   | Hydrophobic                |
| LIG305:C13 | ALA196      | 3.98                   | Hydrophobic                |

|            |        |      |             |
|------------|--------|------|-------------|
| LIG314     | VAL199 | 4.54 | Hydrophobic |
| LIG236     | ILE117 | 4.75 | Hydrophobic |
| LIG237:C13 | LEU146 | 4.65 | Hydrophobic |
| LIG238     | LEU28  | 5.06 | Hydrophobic |
| LIG238:C13 | LEU48  | 4.92 | Hydrophobic |
| LIG239     | LEU127 | 5.46 | Hydrophobic |
| LIG241:C13 | LEU207 | 5.26 | Hydrophobic |
| LIG241:C13 | VAL210 | 5.42 | Hydrophobic |
| LIG241:C13 | LEU211 | 4.88 | Hydrophobic |
| LIG247:C13 | LEU206 | 4.90 | Hydrophobic |
| LIG250:C13 | LEU22  | 5.25 | Hydrophobic |
| LIG252:C13 | LEU19  | 4.77 | Hydrophobic |
| LIG254     | ILE11  | 5.08 | Hydrophobic |
| LIG256:C13 | VAL210 | 4.07 | Hydrophobic |
| LIG258     | ILE117 | 5.20 | Hydrophobic |
| LIG258:C13 | ILE140 | 4.74 | Hydrophobic |
| LIG259:C13 | LEU87  | 4.74 | Hydrophobic |
| LIG261     | LEU92  | 4.39 | Hydrophobic |
| LIG264:C13 | VAL187 | 5.29 | Hydrophobic |
| LIG265:C13 | LEU190 | 4.25 | Hydrophobic |
| LIG273:C13 | LEU25  | 4.37 | Hydrophobic |
| LIG277     | LEU93  | 5.42 | Hydrophobic |
| LIG277     | LEU223 | 5.06 | Hydrophobic |
| LIG277:C13 | LEU48  | 4.53 | Hydrophobic |
| LIG277:C13 | VAL49  | 5.12 | Hydrophobic |
| LIG278     | LEU58  | 4.65 | Hydrophobic |
| LIG282:C13 | MET56  | 4.95 | Hydrophobic |
| LIG286:C13 | LEU58  | 5.18 | Hydrophobic |
| LIG286:C13 | LEU62  | 4.67 | Hydrophobic |
| LIG287:C13 | LEU87  | 4.21 | Hydrophobic |
| LIG290:C13 | ILE222 | 5.32 | Hydrophobic |
| LIG294:C13 | LEU149 | 4.81 | Hydrophobic |
| LIG295:C13 | LEU146 | 5.30 | Hydrophobic |
| LIG308:C13 | LEU207 | 4.73 | Hydrophobic |
| LIG310:C13 | ILE198 | 4.39 | Hydrophobic |
| LIG318:C13 | VAL213 | 5.48 | Hydrophobic |
| LIG320:C13 | LEU61  | 4.56 | Hydrophobic |
| LIG320:C13 | LEU62  | 5.00 | Hydrophobic |
| LIG320     | TRP10  | 5.38 | Hydrophobic |
| LIG254     | TRP12  | 4.99 | Hydrophobic |
| LIG250     | TYR26  | 4.65 | Hydrophobic |
| LIG309:C13 | TRP80  | 4.50 | Hydrophobic |
| LIG259     | TRP80  | 5.09 | Hydrophobic |
| LIG282:C13 | TRP80  | 4.13 | Hydrophobic |
| LIG243:C13 | PHE88  | 4.64 | Hydrophobic |
| LIG260:C13 | PHE88  | 5.17 | Hydrophobic |

|            |        |      |             |
|------------|--------|------|-------------|
| LIG251     | PHE135 | 4.32 | Hydrophobic |
| LIG283     | TRP137 | 4.89 | Hydrophobic |
| LIG316     | TYR147 | 4.67 | Hydrophobic |
| LIG237:C13 | TYR150 | 5.26 | Hydrophobic |
| LIG306     | TYR150 | 4.87 | Hydrophobic |
| LIG294     | PHE153 | 4.61 | Hydrophobic |
| LIG294     | PHE154 | 5.35 | Hydrophobic |
| LIG306     | PHE154 | 4.08 | Hydrophobic |

**Table S21.** Molecular interactions in BP-1 encased BR system.

| <b>Peptide</b>  | <b>BR</b>   | <b>Bond Length (Å)</b> | <b>Type of interaction</b> |
|-----------------|-------------|------------------------|----------------------------|
| ASP6:OD2        | LYS30:NZ    | 5.42                   | Electrostatic              |
| GLK1:HN         | LEU62:O     | 2.28                   | Hydrogen Bond              |
| ASA8:HNL1       | ILE198:O    | 2.80                   | Hydrogen Bond              |
| ASP6:O          | TYR64:HH    | 1.85                   | Hydrogen Bond              |
| ASP6:O          | THR107:HG1  | 1.69                   | Hydrogen Bond              |
| LEU3:O          | ASN176:HD21 | 1.61                   | Hydrogen Bond              |
| LEN5:HB2        | PHE153      | 2.84                   | Hydrophobic                |
| LEU3:C,O;SER4:N | TYR147      | 4.06                   | Hydrophobic                |
| LEU3            | LEU62       | 5.42                   | Hydrophobic                |
| LEU3            | LEU206      | 5.15                   | Hydrophobic                |
| LEU3            | LEU221      | 5.25                   | Hydrophobic                |
| LEU3            | ALA18       | 4.53                   | Hydrophobic                |
| LEU3            | ALA114      | 5.26                   | Hydrophobic                |
| LEU3            | LYS172      | 5.02                   | Hydrophobic                |
| LEU3            | VAL177      | 5.46                   | Hydrophobic                |
| LEU3            | VAL187      | 4.99                   | Hydrophobic                |
| LEU3            | VAL210      | 4.76                   | Hydrophobic                |
| LEU3            | VAL210      | 5.08                   | Hydrophobic                |
| LEU3            | TYR147      | 5.17                   | Hydrophobic                |



**Table S22.** Molecular interactions in LPD-12 encased BR system.

| <b>Peptide</b> | <b>BR</b>   | <b>Bond Length (Å)</b> | <b>Type of interaction</b>  |
|----------------|-------------|------------------------|-----------------------------|
| LYS11:HZ2      | ASP115:OD1  | 1.55                   | Hydrogen Bond;Electrostatic |
| LYS19:HZ1      | ASP104:OD1  | 1.69                   | Hydrogen Bond;Electrostatic |
| LYS22:HZ3      | GLY231:OT2  | 1.79                   | Hydrogen Bond;Electrostatic |
| GLU4:OE2       | LYS30:HZ1   | 1.81                   | Hydrogen Bond;Electrostatic |
| GLU7:OE2       | LYS30:HZ2   | 2.89                   | Hydrogen Bond;Electrostatic |
| GLU7:OE1       | LYS30:HZ3   | 1.76                   | Hydrogen Bond;Electrostatic |
| GLU7:OE2       | ARG225:HH12 | 1.80                   | Hydrogen Bond;Electrostatic |
| GLU4:OE1       | LYS129:NZ   | 4.02                   | Electrostatic               |
| GLU4:OE2       | ARG225:NH2  | 4.72                   | Electrostatic               |
| GLU7:OE1       | ARG225:NH2  | 3.02                   | Electrostatic               |
| LYS8:HZ1       | THR67:OG1   | 2.14                   | Hydrogen Bond               |
| LYS8:HZ1       | MET68:O     | 2.67                   | Hydrogen Bond               |
| LYS8:HZ2       | MET68:O     | 2.21                   | Hydrogen Bond               |
| LYS11:HZ2      | LYS11:HZ2   | 2.51                   | Hydrogen Bond               |
| TYR12:HH       | TYR12:HH    | 1.58                   | Hydrogen Bond               |
| ORL24:HE       | TYR150:OH   | 2.78                   | Hydrogen Bond               |
| ALN25:HNL2     | SER158:O    | 2.13                   | Hydrogen Bond               |
| GLU4:OE2       | TYR26:HH    | 1.89                   | Hydrogen Bond               |
| ALA23:O        | THR55:HG1   | 1.96                   | Hydrogen Bond               |
| ORL24:OI       | GLY65:HN    | 2.39                   | Hydrogen Bond               |
| ORL24:OI       | LEU66:HN    | 1.88                   | Hydrogen Bond               |
| ALA13:O        | GLY106:HN   | 2.06                   | Hydrogen Bond               |
| ORL24:O        | LYS159:HZ1  | 2.14                   | Hydrogen Bond               |
| ALA23:O        | SER162:HG   | 1.73                   | Hydrogen Bond               |
| TYR12          | TYR131      | 5.99                   | Hydrophobic                 |
| ALA5           | VAL136      | 4.96                   | Hydrophobic                 |
| ALA1           | LEU25       | 5.01                   | Hydrophobic                 |
| ALA16          | ILE11       | 4.82                   | Hydrophobic                 |

|          |        |      |             |
|----------|--------|------|-------------|
| ALA9     | VAL124 | 5.09 | Hydrophobic |
| ALA13    | LEU123 | 4.93 | Hydrophobic |
| ALA13    | LEU127 | 5.43 | Hydrophobic |
| ALA6     | LEU190 | 5.10 | Hydrophobic |
| ALA6     | ILE191 | 5.28 | Hydrophobic |
| ALA10    | ILE191 | 4.38 | Hydrophobic |
| ALA10    | ILE198 | 4.57 | Hydrophobic |
| ALA10    | VAL199 | 4.73 | Hydrophobic |
| ALA13    | ILE203 | 5.22 | Hydrophobic |
| ALA17    | ILE203 | 4.36 | Hydrophobic |
| ALA17    | LEU206 | 5.43 | Hydrophobic |
| ALA3     | VAL217 | 4.87 | Hydrophobic |
| ALA3     | LEU221 | 5.01 | Hydrophobic |
| ALA6     | LEU19  | 4.95 | Hydrophobic |
| LYS19    | LEU48  | 5.38 | Hydrophobic |
| ALA23    | LEU48  | 5.05 | Hydrophobic |
| ALA23    | ALA51  | 3.91 | Hydrophobic |
| ALA13    | LEU146 | 4.50 | Hydrophobic |
| ALA14    | LEU146 | 5.30 | Hydrophobic |
| ALA17    | LEU146 | 4.71 | Hydrophobic |
| ALA20    | ILE229 | 5.05 | Hydrophobic |
| TYR12    | LEU15  | 5.31 | Hydrophobic |
| ALA1     | TYR26  | 3.57 | Hydrophobic |
| ALN25:CB | TYR64  | 4.16 | Hydrophobic |
| ALA17    | TRP80  | 4.12 | Hydrophobic |
| ALA21    | TRP80  | 5.06 | Hydrophobic |
| ALA14    | TRP80  | 4.91 | Hydrophobic |
| ALA17    | TRP80  | 4.03 | Hydrophobic |
| LYS22    | PHE88  | 5.24 | Hydrophobic |
| ALA1     | TYR133 | 5.45 | Hydrophobic |
| ALA5     | TYR133 | 5.01 | Hydrophobic |
| ALA6     | TYR147 | 4.32 | Hydrophobic |
| ALA9     | TYR147 | 4.89 | Hydrophobic |
| ALA9     | TYR150 | 4.22 | Hydrophobic |

**Table S23.** Molecular interactions in PD-1 encased BR system.

| <b>Peptide</b> | <b>BR</b>   | <b>Bond Length (Å)</b> | <b>Type of interaction</b>  |
|----------------|-------------|------------------------|-----------------------------|
| LYS23:HZ2      | ASP96:OD2   | 1.93                   | Hydrogen Bond;Electrostatic |
| LYA24:HZ2      | ASP38:OD2   | 1.82                   | Hydrogen Bond;Electrostatic |
| LYS23:NZ       | ASP102:OD2  | 2.95                   | Electrostatic               |
| GLU1:OE1       | GLY6:N      | 4.22                   | Electrostatic               |
| GLU1:OE1       | LYS30:NZ    | 5.11                   | Electrostatic               |
| GLN13:HE22     | THR128:OG1  | 1.74                   | Hydrogen Bond               |
| GLN6:HE22      | GLY113:O    | 2.72                   | Hydrogen Bond               |
| GLN13:HE22     | GLY113:O    | 2.39                   | Hydrogen Bond               |
| GLU2:OE1       | GLY72:HN    | 2.04                   | Hydrogen Bond               |
| GLU2:OE2       | GLY73:HN    | 2.17                   | Hydrogen Bond               |
| GLU1:OE2       | TYR79:HH    | 1.57                   | Hydrogen Bond               |
| GLU1:OE1       | TYR131:HN   | 1.65                   | Hydrogen Bond               |
| GLU2:O         | SER132:HG   | 3.01                   | Hydrogen Bond               |
| GLN9:OE1       | ARG225:HH12 | 1.78                   | Hydrogen Bond               |
| GLN9:OE1       | ARG225:HH22 | 2.30                   | Hydrogen Bond               |
| ALA7           | ILE11       | 4.90                   | Hydrophobic                 |
| ALA7           | LEU15       | 4.03                   | Hydrophobic                 |
| LEU3           | LEU206      | 5.47                   | Hydrophobic                 |
| LEU3           | LEU207      | 4.76                   | Hydrophobic                 |
| LEU4           | LEU207      | 5.34                   | Hydrophobic                 |
| ALA7           | VAL199      | 4.05                   | Hydrophobic                 |
| LEU8           | ILE191      | 5.35                   | Hydrophobic                 |
| ALA11          | ILE191      | 4.68                   | Hydrophobic                 |
| ALA11          | ILE198      | 4.24                   | Hydrophobic                 |
| ALA11          | VAL199      | 5.13                   | Hydrophobic                 |
| LEU4           | LEU190      | 5.06                   | Hydrophobic                 |
| ALA7           | ALA196      | 3.65                   | Hydrophobic                 |
| LEU4           | LEU25       | 4.71                   | Hydrophobic                 |
| ALA7           | LEU22       | 4.29                   | Hydrophobic                 |
| LEU8           | LEU22       | 4.94                   | Hydrophobic                 |
| ALA11          | LEU19       | 5.02                   | Hydrophobic                 |
| ALA11          | LEU22       | 5.22                   | Hydrophobic                 |
| LEU15          | MET209      | 5.31                   | Hydrophobic                 |
| ALA22          | ILE203      | 5.33                   | Hydrophobic                 |
| ALA22          | LEU206      | 5.05                   | Hydrophobic                 |

|       |        |      |             |
|-------|--------|------|-------------|
| LEU4  | MET32  | 5.04 | Hydrophobic |
| ALA7  | MET32  | 5.37 | Hydrophobic |
| LEU8  | MET32  | 4.29 | Hydrophobic |
| ALA11 | LEU28  | 5.12 | Hydrophobic |
| ALA18 | LEU58  | 4.89 | Hydrophobic |
| LEU21 | LEU58  | 5.43 | Hydrophobic |
| ALA22 | LEU61  | 5.18 | Hydrophobic |
| LYS5  | LEU109 | 5.32 | Hydrophobic |
| ALA7  | PRO165 | 4.46 | Hydrophobic |
| ALA11 | PRO165 | 5.08 | Hydrophobic |
| LYS23 | LYS41  | 4.37 | Hydrophobic |
| LYS23 | ILE45  | 5.46 | Hydrophobic |
| LEU3  | ALA14  | 4.69 | Hydrophobic |
| LEU4  | ALA18  | 3.91 | Hydrophobic |
| LEU4  | VAL29  | 5.00 | Hydrophobic |
| LEU8  | PRO165 | 5.34 | Hydrophobic |
| LEU14 | LYS172 | 5.39 | Hydrophobic |
| LEU4  | ALA184 | 5.02 | Hydrophobic |
| LEU4  | VAL187 | 5.31 | Hydrophobic |
| LEU4  | ALA196 | 5.20 | Hydrophobic |
| LEU3  | VAL210 | 4.94 | Hydrophobic |
| LEU15 | VAL210 | 5.34 | Hydrophobic |
| LEU8  | VAL217 | 5.33 | Hydrophobic |
| LEU14 | TRP12  | 5.45 | Hydrophobic |
| ALA11 | TRP12  | 4.36 | Hydrophobic |
| LEU14 | TRP12  | 5.47 | Hydrophobic |
| LYS5  | TYR26  | 4.74 | Hydrophobic |
| ALA18 | PHE54  | 4.81 | Hydrophobic |

**Table S24.** Molecular interactions in A<sub>6</sub>D encased BR system.

| Peptide         | BR          | Bond Length (Å) | Type of interaction             |
|-----------------|-------------|-----------------|---------------------------------|
| ASP7:OD1        | LYS40:HZ1   | 1.84            | Hydrogen Bond;<br>Electrostatic |
| ASP7:OD1        | LYS129:HZ3  | 1.67            | Hydrogen Bond;<br>Electrostatic |
| ASP7:OD1        | LYS172:NZ   | 4.71            | Electrostatic                   |
| ALA4:HN         | ASN176:O    | 1.99            | Hydrogen Bond                   |
| ALA1:HN         | THR55:OG1   | 1.84            | Hydrogen Bond                   |
| ALA6:HN         | LEU127:O    | 1.86            | Hydrogen Bond                   |
| ALA1:HN         | SER59:OG    | 2.89            | Hydrogen Bond                   |
| ALA2:HN         | SER59:OG    | 2.00            | Hydrogen Bond                   |
| ALA3:O          | TRP10:HN    | 2.73            | Hydrogen Bond                   |
| ALA4:O          | TYR64:HH    | 1.76            | Hydrogen Bond                   |
| ALA6:O          | LYS129:HN   | 2.72            | Hydrogen Bond                   |
| ALA1:O          | TYR147:HH   | 1.80            | Hydrogen Bond                   |
| ASP7:OT2        | LYS172:HZ3  | 1.72            | Hydrogen Bond                   |
| ALA6:O          | ASN176:HD22 | 1.98            | Hydrogen Bond                   |
| ALA6:O          | ARG225:HH12 | 2.08            | Hydrogen Bond                   |
| ASP7:OT1        | ARG225:HH12 | 2.72            | Hydrogen Bond                   |
| ALA1:C,O;ALA2:N | TYR64       | 5.00            | Hydrophobic                     |
| ALA2            | ALA184      | 3.39            | Hydrophobic                     |
| ALA2            | VAL188      | 5.04            | Hydrophobic                     |
| ALA2            | LEU207      | 4.39            | Hydrophobic                     |
| ALA3            | VAL180      | 4.11            | Hydrophobic                     |
| ALA3            | ALA184      | 4.31            | Hydrophobic                     |
| ALA5            | VAL180      | 4.48            | Hydrophobic                     |
| ALA2            | LEU15       | 4.52            | Hydrophobic                     |
| ALA2            | LEU19       | 4.96            | Hydrophobic                     |
| ALA2            | MET209      | 4.91            | Hydrophobic                     |
| ALA3            | VAL210      | 4.41            | Hydrophobic                     |
| ALA3            | VAL213      | 4.12            | Hydrophobic                     |
| ALA5            | VAL217      | 4.94            | Hydrophobic                     |
| ALA5            | LEU221      | 4.69            | Hydrophobic                     |
| ALA1            | VAL177      | 4.34            | Hydrophobic                     |
| ALA3            | VAL177      | 4.64            | Hydrophobic                     |
| ALA4            | VAL179      | 4.33            | Hydrophobic                     |
| ALA4            | VAL180      | 4.85            | Hydrophobic                     |
| ALA1            | LEU58       | 5.09            | Hydrophobic                     |

|      |        |      |             |
|------|--------|------|-------------|
| ALA2 | ALA51  | 4.12 | Hydrophobic |
| ALA4 | ALA44  | 4.06 | Hydrophobic |
| ALA5 | MET32  | 4.47 | Hydrophobic |
| ALA5 | LYS40  | 4.65 | Hydrophobic |
| ALA5 | VAL69  | 4.18 | Hydrophobic |
| ALA5 | LYS129 | 4.66 | Hydrophobic |
| ALA6 | VAL124 | 4.40 | Hydrophobic |
| ALA6 | LEU127 | 5.42 | Hydrophobic |
| ALA4 | ILE52  | 4.99 | Hydrophobic |
| ALA1 | LEU109 | 4.28 | Hydrophobic |
| ALA2 | ALA110 | 3.89 | Hydrophobic |
| ALA2 | LEU206 | 4.49 | Hydrophobic |
| ALA2 | VAL210 | 5.23 | Hydrophobic |
| ALA4 | LEU206 | 5.33 | Hydrophobic |
| ALA4 | ILE198 | 3.88 | Hydrophobic |
| ALA5 | ILE191 | 4.86 | Hydrophobic |
| ALA5 | ILE198 | 4.89 | Hydrophobic |
| ALA1 | VAL151 | 3.99 | Hydrophobic |
| ALA2 | LEU58  | 5.35 | Hydrophobic |
| ALA2 | LEU61  | 4.37 | Hydrophobic |
| ALA2 | LEU62  | 4.39 | Hydrophobic |
| ALA1 | PRO77  | 4.59 | Hydrophobic |
| ALA4 | ARG7   | 3.68 | Hydrophobic |
| ALA1 | ALA14  | 4.36 | Hydrophobic |
| ALA1 | LEU61  | 5.24 | Hydrophobic |
| ALA3 | ILE11  | 4.34 | Hydrophobic |
| ALA3 | ALA14  | 4.30 | Hydrophobic |
| ALA3 | LEU15  | 4.88 | Hydrophobic |
| ALA3 | ALA3   | 5.37 | Hydrophobic |
| ALA4 | ALA4   | 4.28 | Hydrophobic |
| ALA4 | ALA4   | 4.83 | Hydrophobic |
| ALA1 | ALA1   | 4.88 | Hydrophobic |
| ALA2 | ALA2   | 4.46 | Hydrophobic |
| ALA3 | ALA3   | 4.29 | Hydrophobic |
| ALA1 | ALA1   | 5.03 | Hydrophobic |
| ALA2 | ALA2   | 4.69 | Hydrophobic |
| ALA3 | ALA3   | 5.46 | Hydrophobic |
| ALA3 | ALA3   | 4.58 | Hydrophobic |

**Table S25.** Molecular interactions in A<sub>6</sub>K encased BR system.

| Peptide   | BR          | Bond Length (Å) | Type of interactions        |
|-----------|-------------|-----------------|-----------------------------|
| LYA7:HZ2  | ASP115:OD1  | 1.78            | Hydrogen Bond;Electrostatic |
| LYA7:HZ3  | ASP96:OD1   | 1.64            | Hydrogen Bond;Electrostatic |
| LYA7:HZ3  | GLU74:OE1   | 1.85            | Hydrogen Bond;Electrostatic |
| LYA7:HZ3  | VAL112:O    | 1.83            | Hydrogen Bond               |
| ALA1:HN   | GLY21:O     | 2.26            | Hydrogen Bond               |
| ALA6:HN   | SER183:OG   | 1.89            | Hydrogen Bond               |
| ALA3:HN   | ALA44:O     | 2.72            | Hydrogen Bond               |
| LYA7:HNL1 | ALA143:O    | 2.96            | Hydrogen Bond               |
| ALA3:HN   | ALA110:O    | 2.09            | Hydrogen Bond               |
| ALA1:HN   | SER214:OG   | 2.00            | Hydrogen Bond               |
| LYA7:HNL2 | SER158:OG   | 1.99            | Hydrogen Bond               |
| ALA4:O    | LYS129:HN   | 2.34            | Hydrogen Bond               |
| ACE0:O    | TYR147:HH   | 1.85            | Hydrogen Bond               |
| ALA6:O    | ARG225:HH12 | 2.50            | Hydrogen Bond               |
| ALA6:O    | ARG225:HH22 | 1.73            | Hydrogen Bond               |
| ALA2:HA   | PHE54       | 2.93            | Hydrophobic                 |
| ALA1      | LEU207      | 4.68            | Hydrophobic                 |
| ALA3      | VAL180      | 4.89            | Hydrophobic                 |
| ALA3      | ALA184      | 4.15            | Hydrophobic                 |
| ALA4      | LEU181      | 5.45            | Hydrophobic                 |
| ALA4      | VAL210      | 5.23            | Hydrophobic                 |
| ALA4      | LEU211      | 5.19            | Hydrophobic                 |
| ALA1      | LEU87       | 4.39            | Hydrophobic                 |
| ALA2      | ILE52       | 5.05            | Hydrophobic                 |
| ALA2      | MET56       | 5.39            | Hydrophobic                 |
| ALA3      | ILE52       | 3.83            | Hydrophobic                 |
| ALA1      | VAL180      | 4.75            | Hydrophobic                 |
| ALA1      | LEU181      | 4.60            | Hydrophobic                 |
| ALA3      | VAL173      | 4.78            | Hydrophobic                 |
| ALA1      | LEU25       | 4.72            | Hydrophobic                 |
| ALA3      | ALA51       | 4.44            | Hydrophobic                 |
| ALA6      | ALA51       | 4.32            | Hydrophobic                 |
| ALA2      | VAL173      | 4.44            | Hydrophobic                 |
| ALA6      | PRO165      | 3.71            | Hydrophobic                 |

|      |        |      |             |
|------|--------|------|-------------|
| ALA5 | VAL136 | 4.38 | Hydrophobic |
| ALA5 | ALA139 | 4.39 | Hydrophobic |
| ALA3 | VAL179 | 4.70 | Hydrophobic |
| ALA3 | VAL180 | 5.39 | Hydrophobic |
| ALA6 | VAL187 | 4.89 | Hydrophobic |
| ALA2 | LEU48  | 4.51 | Hydrophobic |
| ALA3 | ALA44  | 4.35 | Hydrophobic |
| ALA5 | LYS41  | 4.52 | Hydrophobic |
| ALA5 | ALA44  | 3.75 | Hydrophobic |
| ALA5 | ILE45  | 4.67 | Hydrophobic |
| ALA6 | LYS41  | 5.17 | Hydrophobic |
| ALA1 | ALA144 | 3.95 | Hydrophobic |
| ALA2 | ALA110 | 4.12 | Hydrophobic |
| ALA2 | ALA114 | 4.14 | Hydrophobic |
| ALA1 | LEU66  | 5.03 | Hydrophobic |
| ALA1 | PRO77  | 4.39 | Hydrophobic |
| ALA2 | ARG7   | 4.79 | Hydrophobic |
| ALA5 | MET68  | 5.19 | Hydrophobic |
| ALA5 | PRO77  | 3.68 | Hydrophobic |
| ALA4 | ALA18  | 4.28 | Hydrophobic |
| ALA2 | VAL217 | 4.12 | Hydrophobic |
| ALA2 | LEU221 | 5.13 | Hydrophobic |
| ALA4 | VAL217 | 4.26 | Hydrophobic |
| ALA6 | LEU19  | 5.33 | Hydrophobic |
| ALA6 | LEU22  | 4.13 | Hydrophobic |
| ALA6 | LYS159 | 4.69 | Hydrophobic |
| ALA3 | PHE54  | 4.39 | Hydrophobic |
| ALA5 | TYR64  | 4.10 | Hydrophobic |
| ALA1 | TYR79  | 5.21 | Hydrophobic |
| ALA3 | PHE88  | 3.94 | Hydrophobic |
| ALA5 | PHE88  | 4.54 | Hydrophobic |
| ALA1 | TYR133 | 4.04 | Hydrophobic |
| ALA6 | TYR133 | 5.26 | Hydrophobic |
| ALA1 | TRP137 | 4.58 | Hydrophobic |
| ALA1 | TRP137 | 5.45 | Hydrophobic |
| ALA1 | TYR147 | 4.10 | Hydrophobic |
| ALA4 | TYR150 | 4.86 | Hydrophobic |
| ALA5 | TYR150 | 3.83 | Hydrophobic |
| ALA2 | TYR150 | 4.54 | Hydrophobic |
| ALA5 | PHE156 | 4.55 | Hydrophobic |
